# Supplementary material for: 1,3,5-Triaza-7-Phosphaadamantane (PTA) as a 31P NMR Probe for Organometallic Transition Metal Complexes in Solution
Source: MDPI journal article supplement (doi:10.3390/molecules26051390), 2021-03-04
Supplement: s1 [file s1]

# 1,3,5-Triaza-7-Phosphaadamantane (PTA) as a $^{31}\text{P}$ NMR Probe for Organometallic Transition Metal Complexes in Solution

Ilya G. Shenderovich

Institute of Organic Chemistry, University of Regensburg, Universitaetstrasse 31, 93053 Regensburg, Germany;  
Ilya.Shenderovich@ur.de

## Section 1.

Chemical shift is a tensor quantity, the components of which are  $\delta_{11} \geq \delta_{22} \geq \delta_{33}$ . In solution NMR, this anisotropy is averaged out by fast molecular tumbling, and only a single isotropic chemical shift value is observed,  $\delta_{\text{iso}} = (\delta_{11} + \delta_{22} + \delta_{33})/3$ . Theoretical calculations provide the absolute chemical shielding tensor, the components of which are  $\sigma_{11} \leq \sigma_{22} \leq \sigma_{33}$ ,  $\sigma_{\text{iso}} = (\sigma_{11} + \sigma_{22} + \sigma_{33})/3$ .  $\delta_{\text{iso}} = (\sigma^{\text{ref}} - \sigma_{\text{iso}})$ .

**Table S1.**  $^{31}\text{P}$  NMR absolute shielding tensors of PTA calculated under the  $\omega\text{B97XD/Def2QZVP}$  approximation.

| Basis    | PCM Solvent | $\sigma_{\text{iso}}$ , ppm | $\sigma_{11}$ , ppm | $\sigma_{22}$ , ppm | $\sigma_{33}$ , ppm |
|----------|-------------|-----------------------------|---------------------|---------------------|---------------------|
| Def2TZVP | ---         | 410                         | 403                 | 414                 | 414                 |
| Def2QZVP | ---         | 412                         | 408                 | 415                 | 415                 |
| Def2QZVP | Toluene     | 411                         | 406                 | 414                 | 414                 |
| Def2QZVP | DMSO        | 410                         | 404                 | 413                 | 413                 |
| Def2QZVP | Water       | 410                         | 404                 | 413                 | 413                 |

The experimental value of the  $^{31}\text{P}$  chemical shift in crystalline PTA is  $\delta_{\text{iso}} = -104.3$  ppm [1].

[1] Shenderovich, I. G. Experimentally Established Benchmark Calculations of  $^{31}\text{P}$  NMR Quantities. *Chemistry – Methods* **2021**, *1*, 61–70, DOI: 10.1002/cmtd.202000033.

**Table S2.**  $^{31}\text{P}$  NMR absolute shielding tensors calculated under the  $\omega\text{B97XD/Def2QZVP}$  approximation.

| Structure                                                                                                  | PCM Solvent       | $\sigma_{\text{iso}}$ , ppm | $\sigma_{11}$ , ppm | $\sigma_{22}$ , ppm | $\sigma_{33}$ , ppm | $q^a$     |
|------------------------------------------------------------------------------------------------------------|-------------------|-----------------------------|---------------------|---------------------|---------------------|-----------|
| <i>cis</i> -Cl <sub>2</sub> Ru(PTA) <sub>4</sub> ; <b>2</b> <sub>opt</sub>                                 | water             | 287                         | 204                 | 226                 | 431                 | 0.054101  |
|                                                                                                            |                   | 330                         | 283                 | 292                 | 416                 | -0.543649 |
|                                                                                                            |                   | 285                         | 199                 | 221                 | 434                 | -0.074485 |
|                                                                                                            |                   | 343                         | 297                 | 319                 | 414                 | -0.346663 |
|                                                                                                            |                   | 238                         | 126                 | 170                 | 418                 | -0.222149 |
| Ru <sup>2+</sup> (PTA) <sub>4</sub>                                                                        | water             | 336                         | 291                 | 312                 | 405                 | -0.290324 |
|                                                                                                            |                   | 238                         | 126                 | 170                 | 418                 | -0.222089 |
|                                                                                                            |                   | 336                         | 291                 | 312                 | 405                 | -0.290186 |
| [ <i>trans</i> -Cl <sub>2</sub> Rh(PTA) <sub>2</sub> ] <sub>2</sub> ; <b>3</b> <sub>XRD</sub> <sup>-</sup> | water             | 327                         | 264                 | 299                 | 418                 | 0.033485  |
|                                                                                                            |                   | 327                         | 264                 | 299                 | 418                 | 0.033517  |
|                                                                                                            |                   | 333                         | 269                 | 304                 | 425                 | 0.050166  |
| [ <i>trans</i> -Cl <sub>2</sub> Rh(PTA) <sub>2</sub> ] <sub>2</sub> ; <b>3</b> <sub>opt</sub> <sup>-</sup> | water             | 333                         | 269                 | 304                 | 425                 | 0.050168  |
|                                                                                                            |                   | 483                         | 352                 | 354                 | 743                 | -0.007600 |
|                                                                                                            |                   | 483                         | 352                 | 354                 | 743                 | -0.007600 |
| Rh <sup>+</sup> (PTA) <sub>2</sub>                                                                         | water             | 354                         | 306                 | 308                 | 450                 | -0.107370 |
|                                                                                                            |                   | 354                         | 308                 | 309                 | 446                 | -0.096343 |
|                                                                                                            |                   | 355                         | 306                 | 311                 | 449                 | -0.121543 |
| Ni(PTA) <sub>4</sub> ; <b>4</b> <sub>opt</sub>                                                             | water             | 355                         | 308                 | 308                 | 449                 | -0.141728 |
|                                                                                                            |                   | 364                         | 327                 | 328                 | 436                 | -0.170936 |
|                                                                                                            |                   | 361                         | 323                 | 324                 | 437                 | -0.189688 |
| Pd(PTA) <sub>4</sub> ; <b>5</b> <sub>opt</sub>                                                             | water             | 365                         | 327                 | 331                 | 436                 | -0.173531 |
|                                                                                                            |                   | 365                         | 328                 | 330                 | 436                 | -0.182472 |
|                                                                                                            |                   | 347                         | 297                 | 301                 | 443                 | -0.106119 |
| Pt(PTA) <sub>4</sub> ; <b>6</b> <sub>opt</sub>                                                             | water             | 342                         | 288                 | 289                 | 448                 | -0.073946 |
|                                                                                                            |                   | 347                         | 296                 | 300                 | 443                 | -0.098733 |
|                                                                                                            |                   | 347                         | 296                 | 301                 | 443                 | -0.105800 |
| Cl <sub>2</sub> Ni(PTA) <sub>2</sub> ; <i>cis</i> - <b>7</b> <sub>opt</sub>                                | water             | 321                         | 258                 | 301                 | 404                 | 0.108029  |
|                                                                                                            |                   | 329                         | 278                 | 302                 | 406                 | 0.063692  |
| Cl <sub>2</sub> Ni(PTA) <sub>2</sub> ; <i>trans</i> - <b>7</b> <sub>opt</sub>                              | water             | 344                         | 312                 | 324                 | 397                 | 0.206707  |
|                                                                                                            |                   | 344                         | 312                 | 324                 | 397                 | 0.206707  |
| Cl <sub>2</sub> Pd(PTA) <sub>2</sub> ; <i>cis</i> - <b>8</b> <sub>XRD</sub>                                | water             | 332                         | 292                 | 297                 | 407                 | 0.110805  |
|                                                                                                            |                   | 323                         | 270                 | 294                 | 404                 | 0.144806  |
| Cl <sub>2</sub> Pd(PTA) <sub>2</sub> ; <i>cis</i> - <b>8</b> <sub>opt</sub>                                | water             | 322                         | 271                 | 290                 | 405                 | 0.167048  |
|                                                                                                            |                   | 321                         | 264                 | 290                 | 407                 | 0.134686  |
| Cl <sub>2</sub> Pd(PTA) <sub>2</sub> ; <i>trans</i> - <b>8</b> <sub>opt</sub>                              | water             | 345                         | 316                 | 318                 | 402                 | 0.146598  |
|                                                                                                            |                   | 345                         | 316                 | 318                 | 402                 | 0.146598  |
| Cl <sub>2</sub> Pt(PTA) <sub>2</sub> ; <i>cis</i> - <b>9</b> <sub>XRD</sub>                                | water             | 328                         | 272                 | 301                 | 413                 | 0.131217  |
|                                                                                                            |                   | 332                         | 280                 | 302                 | 413                 | 0.103384  |
| Cl <sub>2</sub> Pt(PTA) <sub>2</sub> ; <i>cis</i> - <b>9</b> <sub>opt</sub>                                | water             | 325                         | 266                 | 294                 | 414                 | 0.133139  |
|                                                                                                            |                   | 326                         | 272                 | 296                 | 411                 | 0.141407  |
| Cl <sub>2</sub> Pt(PTA) <sub>2</sub> ; <i>trans</i> - <b>9</b> <sub>XRD</sub>                              | water             | 356                         | 324                 | 333                 | 412                 | 0.262388  |
|                                                                                                            |                   | 356                         | 324                 | 333                 | 412                 | 0.262388  |
| Cl <sub>2</sub> Pt(PTA) <sub>2</sub> ; <i>trans</i> - <b>9</b> <sub>opt</sub>                              | water             | 354                         | 325                 | 331                 | 406                 | 0.203431  |
|                                                                                                            |                   | 354                         | 325                 | 331                 | 406                 | 0.203431  |
| Cu <sup>+</sup> (PTA) <sub>4</sub> ; <b>10</b> <sub>opt</sub> <sup>+</sup>                                 | water             | 392                         | 381                 | 385                 | 411                 | -0.153649 |
|                                                                                                            |                   | 392                         | 382                 | 383                 | 410                 | -0.080036 |
|                                                                                                            |                   | 392                         | 381                 | 385                 | 411                 | -0.153224 |
| [LCS <sub>2</sub> ]Cu(PTA); <b>11</b> <sub>opt</sub>                                                       | CHCl <sub>3</sub> | 393                         | 383                 | 384                 | 411                 | -0.149503 |
|                                                                                                            |                   | 404                         | 393                 | 400                 | 419                 |           |
| ClAu(PTA); <b>12</b> <sub>XRD</sub>                                                                        | DMSO              | 370                         | 346                 | 356                 | 409                 | -0.114594 |

|                                                                         |                   |     |     |     |     |           |
|-------------------------------------------------------------------------|-------------------|-----|-----|-----|-----|-----------|
| ClAu(PTA); <b>12</b> <sub>opt</sub>                                     | DMSO              | 370 | 352 | 353 | 406 | -0.099675 |
| IAu(PTA); <b>14</b> <sub>opt</sub>                                      | DMSO              | 378 | 364 | 364 | 406 | -0.101854 |
| Au <sup>+</sup> (PTA)                                                   | DMSO              | 334 | 302 | 302 | 397 | -0.147841 |
| F <sub>5</sub> C <sub>6</sub> Au(PTA); <b>15</b> <sub>XRD</sub>         | CHCl <sub>3</sub> | 381 | 364 | 370 | 408 | 0.037136  |
| F <sub>5</sub> C <sub>6</sub> Au(PTA); <b>15</b> <sub>opt</sub>         | CHCl <sub>3</sub> | 384 | 370 | 372 | 409 |           |
| H <sub>5</sub> C <sub>6</sub> SAu(PTA); <b>16</b> <sub>XRD</sub>        | CHCl <sub>3</sub> | 386 | 367 | 378 | 412 | -0.059768 |
| H <sub>5</sub> C <sub>6</sub> SAu(PTA); <b>16</b> <sub>opt</sub>        | CHCl <sub>3</sub> | 382 | 368 | 370 | 409 | -0.053475 |
| [(py <sup>b</sup> -H)ClAu] <sup>+</sup> (PTA); <b>17</b> <sub>XRD</sub> | acetone           | 324 | 286 | 298 | 388 | -0.075234 |
| [(py <sup>b</sup> -H)ClAu] <sup>+</sup> (PTA); <b>17</b> <sub>opt</sub> | acetone           | 321 | 281 | 292 | 391 | -0.073127 |
| Cl <sub>2</sub> Hg(PTA); <b>18</b> <sub>opt</sub> (gas)                 | -----             | 412 | 404 | 413 | 419 | -0.011421 |
| Cl <sub>2</sub> Hg(PTA); <b>18</b> <sub>opt</sub> (water)               | water             | 385 | 379 | 382 | 394 | 0.033021  |
| I <sub>2</sub> Hg(PTA); <b>20</b> <sub>opt</sub> (gas)                  | -----             | 411 | 406 | 408 | 419 | 0.003446  |
| I <sub>2</sub> Hg(PTA); <b>20</b> <sub>opt</sub> (water)                | water             | 382 | 370 | 380 | 395 | 0.056797  |
| Hg <sup>2+</sup> (PTA)                                                  | water             | 345 | 327 | 327 | 383 | 0.174000  |

<sup>a</sup>The Mulliken charge of the phosphorous atom.

**Table S3.** <sup>31</sup>P NMR absolute shielding tensors calculated under the  $\omega$ B97XD/Def2TZVP approximation.

| Structure                                                                       | PCM Solvent       | $\sigma_{\text{iso}}$ , ppm | $\sigma_{11}$ , ppm | $\sigma_{22}$ , ppm | $\sigma_{33}$ , ppm | $q^a$    |
|---------------------------------------------------------------------------------|-------------------|-----------------------------|---------------------|---------------------|---------------------|----------|
| <i>cis</i> -Cl <sub>2</sub> Ru(PTA) <sub>4</sub> ; <b>2</b> <sub>XRD</sub>      | water             | 276                         | 188                 | 216                 | 425                 | 0.392638 |
|                                                                                 |                   | 324                         | 270                 | 295                 | 407                 | 0.339719 |
|                                                                                 |                   | 277                         | 184                 | 219                 | 227                 | 0.370962 |
|                                                                                 |                   | 329                         | 278                 | 306                 | 405                 | 0.376701 |
| <i>cis</i> -Cl <sub>2</sub> Ru(PTA) <sub>4</sub> ; <b>2</b> <sub>opt</sub>      | water             | 280                         | 196                 | 218                 | 425                 | 0.389824 |
|                                                                                 |                   | 323                         | 275                 | 284                 | 409                 | 0.339821 |
|                                                                                 |                   | 277                         | 190                 | 212                 | 428                 | 0.375025 |
|                                                                                 |                   | 337                         | 290                 | 312                 | 407                 | 0.369276 |
| [ <i>trans</i> -Cl <sub>2</sub> Rh(PTA) <sub>2</sub> ]; <b>3</b> <sub>opt</sub> | water             | 327                         | 263                 | 300                 | 419                 | 0.318457 |
|                                                                                 |                   | 327                         | 263                 | 300                 | 419                 | 0.318456 |
|                                                                                 |                   | 348                         | 299                 | 301                 | 443                 | 0.186814 |
| Ni(PTA) <sub>4</sub> ; <b>4</b> <sub>opt</sub>                                  | water             | 349                         | 302                 | 303                 | 442                 | 0.178645 |
|                                                                                 |                   | 349                         | 300                 | 304                 | 443                 | 0.181922 |
|                                                                                 |                   | 348                         | 300                 | 301                 | 443                 | 0.181586 |
|                                                                                 |                   | 359                         | 322                 | 324                 | 430                 | 0.224303 |
| Pd(PTA) <sub>4</sub> ; <b>5</b> <sub>opt</sub>                                  | water             | 357                         | 319                 | 320                 | 432                 | 0.303474 |
|                                                                                 |                   | 359                         | 321                 | 325                 | 430                 | 0.225690 |
|                                                                                 |                   | 359                         | 322                 | 324                 | 430                 | 0.223539 |
|                                                                                 |                   | 341                         | 291                 | 296                 | 437                 | 0.038275 |
| Pt(PTA) <sub>4</sub> ; <b>6</b> <sub>opt</sub>                                  | water             | 336                         | 282                 | 283                 | 443                 | 0.135746 |
|                                                                                 |                   | 341                         | 291                 | 296                 | 438                 | 0.043332 |
|                                                                                 |                   | 341                         | 291                 | 295                 | 437                 | 0.039016 |
|                                                                                 |                   | 316                         | 253                 | 296                 | 398                 | 0.369638 |
| Cl <sub>2</sub> Ni(PTA) <sub>2</sub> ; <i>cis</i> - <b>7</b> <sub>opt</sub>     | water             | 323                         | 273                 | 297                 | 399                 | 0.356381 |
|                                                                                 |                   | 339                         | 306                 | 319                 | 390                 | 0.438339 |
| Cl <sub>2</sub> Ni(PTA) <sub>2</sub> ; <i>trans</i> - <b>7</b> <sub>opt</sub>   | water             | 339                         | 306                 | 319                 | 390                 | 0.438339 |
|                                                                                 |                   | 316                         | 265                 | 284                 | 398                 | 0.335398 |
| Cl <sub>2</sub> Pd(PTA) <sub>2</sub> ; <i>cis</i> - <b>8</b> <sub>opt</sub>     | water             | 315                         | 258                 | 285                 | 400                 | 0.317341 |
|                                                                                 |                   | 339                         | 310                 | 313                 | 395                 | 0.396654 |
| Cl <sub>2</sub> Pd(PTA) <sub>2</sub> ; <i>trans</i> - <b>8</b> <sub>opt</sub>   | water             | 339                         | 310                 | 313                 | 395                 | 0.396654 |
|                                                                                 |                   | 320                         | 262                 | 290                 | 408                 | 0.124906 |
| Cl <sub>2</sub> Pt(PTA) <sub>2</sub> ; <i>cis</i> - <b>9</b> <sub>opt</sub>     | water             | 321                         | 267                 | 291                 | 404                 | 0.127911 |
|                                                                                 |                   | 348                         | 319                 | 326                 | 400                 | 0.172353 |
| Cl <sub>2</sub> Pt(PTA) <sub>2</sub> ; <i>trans</i> - <b>9</b> <sub>opt</sub>   | water             | 248                         | 319                 | 326                 | 400                 | 0.172353 |
|                                                                                 |                   | 388                         | 378                 | 381                 | 404                 | 0.232643 |
| Cu <sup>+</sup> (PTA) <sub>4</sub> ; <b>10</b> <sub>opt</sub> <sup>+</sup>      | water             | 386                         | 377                 | 378                 | 404                 | 0.268338 |
|                                                                                 |                   | 387                         | 378                 | 381                 | 403                 | 0.232518 |
|                                                                                 |                   | 387                         | 378                 | 381                 | 404                 | 0.235990 |
| [LCS <sub>2</sub> ]Cu(PTA); <b>11</b> <sub>opt</sub>                            | CHCl <sub>3</sub> | 400                         | 390                 | 397                 | 413                 | 0.295766 |
| ClAu(PTA); <b>12</b> <sub>opt</sub>                                             | DMSO              | 367                         | 350                 | 350                 | 400                 | 0.016382 |
| IAu(PTA); <b>14</b> <sub>opt</sub>                                              | DMSO              | 374                         | 361                 | 361                 | 399                 | 0.034889 |
| F <sub>5</sub> C <sub>6</sub> Au(PTA); <b>15</b> <sub>opt</sub>                 | CHCl <sub>3</sub> | 379                         | 366                 | 369                 | 402                 | 0.088361 |
| H <sub>5</sub> C <sub>6</sub> SAu(PTA); <b>16</b> <sub>opt</sub>                | CHCl <sub>3</sub> | 379                         | 366                 | 367                 | 403                 | 0.017321 |
| [(py <sup>b</sup> -H)ClAu] <sup>+</sup> (PTA); <b>17</b> <sub>opt</sub>         | acetone           | 315                         | 274                 | 286                 | 384                 | 0.212631 |
| Cl <sub>2</sub> Hg(PTA); <b>18</b> <sub>opt</sub> (water)                       | water             | 380                         | 375                 | 379                 | 388                 | 0.116434 |
| l <sub>2</sub> Hg(PTA); <b>20</b> <sub>opt</sub> (water)                        | water             | 376                         | 365                 | 375                 | 389                 | 0.149688 |

<sup>a</sup>The Mulliken charge of the phosphorous atom.

## Section 2.

The atomic coordinates (Å) of *cis*-Cl<sub>2</sub>Ru(PTA)<sub>4</sub>; 2<sub>XRD</sub>.

|    |           |           |           |
|----|-----------|-----------|-----------|
| 44 | 0.012564  | 0.043208  | -0.602827 |
| 17 | 0.135668  | -1.765152 | -2.307862 |
| 17 | -0.012299 | 1.565858  | -2.590328 |
| 15 | -0.250620 | 1.914972  | 0.646795  |
| 15 | -2.295586 | -0.323469 | -0.851183 |
| 15 | 0.146252  | -1.399102 | 1.122008  |
| 15 | 2.387751  | 0.042842  | -0.858656 |
| 7  | -1.147805 | 3.261011  | 2.924363  |
| 7  | 0.841136  | 4.216756  | 1.813721  |
| 7  | -1.376425 | 4.445706  | 0.768985  |
| 7  | -5.015903 | -0.008243 | -0.432173 |
| 7  | -4.298638 | -0.315946 | -2.773197 |
| 7  | -4.304731 | -2.225938 | -1.223015 |
| 7  | 1.566372  | -2.455832 | 3.278083  |
| 7  | 0.343214  | -4.068243 | 1.844668  |
| 7  | -0.891354 | -2.620864 | 3.425156  |
| 7  | 4.511166  | 0.548147  | -2.591697 |
| 7  | 5.047665  | 0.558441  | -0.186380 |
| 7  | 4.601912  | -1.563716 | -1.339703 |
| 6  | -1.011055 | 1.920455  | 2.346131  |
| 6  | 1.204038  | 2.973952  | 1.087878  |
| 6  | -1.276069 | 3.272596  | -0.098923 |
| 6  | 0.172472  | 3.904475  | 3.076036  |
| 6  | -0.054962 | 5.038593  | 0.985286  |
| 6  | -1.970358 | 4.100471  | 2.060764  |
| 6  | -3.705231 | 0.412745  | 0.097938  |
| 6  | -2.904721 | 0.096256  | -2.533837 |
| 6  | -2.889765 | -2.079561 | -0.804215 |
| 6  | -4.482557 | -1.761656 | -2.607725 |
| 6  | -5.170824 | 0.366891  | -1.846177 |
| 6  | -5.182957 | -1.477201 | -0.335143 |
| 6  | 1.591855  | -1.363050 | 2.300522  |
| 6  | 0.215671  | -3.188951 | 0.677981  |
| 6  | -1.164897 | -1.561451 | 2.442686  |
| 6  | 1.555389  | -3.757005 | 2.606291  |
| 6  | 0.376970  | -2.369205 | 4.121705  |

|   |           |           |           |
|---|-----------|-----------|-----------|
| 6 | -0.795803 | -3.926580 | 2.747817  |
| 6 | 3.060031  | 0.756892  | -2.431380 |
| 6 | 3.165580  | -1.638386 | -1.030881 |
| 6 | 3.660829  | 0.798392  | 0.269648  |
| 6 | 5.264738  | 1.166331  | -1.496675 |
| 6 | 4.819185  | -0.868575 | -2.607363 |
| 6 | 5.324786  | -0.871308 | -0.278788 |
| 1 | -0.381804 | 1.318375  | 3.005478  |
| 1 | -1.994402 | 1.447527  | 2.306852  |
| 1 | 1.729646  | 3.242390  | 0.169252  |
| 1 | 1.883958  | 2.392153  | 1.711877  |
| 1 | -2.274613 | 2.902397  | -0.329982 |
| 1 | -0.816042 | 3.547483  | -1.045894 |
| 1 | 0.815124  | 3.254108  | 3.670796  |
| 1 | 0.022945  | 4.839370  | 3.619285  |
| 1 | 0.418356  | 5.222274  | 0.020625  |
| 1 | -0.192418 | 5.994609  | 1.494982  |
| 1 | -2.165327 | 5.033542  | 2.594661  |
| 1 | -2.927400 | 3.605107  | 1.887501  |
| 1 | -3.651623 | 1.500849  | 0.062684  |
| 1 | -3.638147 | 0.118960  | 1.148092  |
| 1 | -2.242667 | -0.386221 | -3.252411 |
| 1 | -2.814125 | 1.171458  | -2.683655 |
| 1 | -2.789408 | -2.486061 | 0.201625  |
| 1 | -2.251893 | -2.661995 | -1.467429 |
| 1 | -3.779052 | -2.290625 | -3.251029 |
| 1 | -5.499607 | -2.009093 | -2.917525 |
| 1 | -5.017403 | 1.444150  | -1.937003 |
| 1 | -6.205576 | 0.149429  | -2.122099 |
| 1 | -6.216864 | -1.706916 | -0.599749 |
| 1 | -5.009236 | -1.788481 | 0.695772  |
| 1 | 1.595860  | -0.402849 | 2.821562  |
| 1 | 2.521337  | -1.426779 | 1.737802  |
| 1 | 1.053366  | -3.356944 | 0.001551  |
| 1 | -0.682923 | -3.450602 | 0.120565  |
| 1 | -2.131502 | -1.754051 | 1.976732  |
| 1 | -1.258378 | -0.615005 | 2.973266  |

|   |           |           |           |
|---|-----------|-----------|-----------|
| 1 | 1.670914  | -4.524456 | 3.374220  |
| 1 | 2.416508  | -3.815223 | 1.937702  |
| 1 | 0.336234  | -1.381884 | 4.584352  |
| 1 | 0.471881  | -3.115410 | 4.913001  |
| 1 | -0.710923 | -4.693581 | 3.519924  |
| 1 | -1.718361 | -4.101044 | 2.191487  |
| 1 | 2.837864  | 1.823463  | -2.450642 |
| 1 | 2.528480  | 0.300237  | -3.265551 |
| 1 | 2.640813  | -2.163814 | -1.825683 |
| 1 | 3.034727  | -2.215018 | -0.115134 |
| 1 | 3.547511  | 0.420006  | 1.285786  |
| 1 | 3.499000  | 1.874542  | 0.304818  |
| 1 | 5.009285  | 2.225697  | -1.443712 |
| 1 | 6.327160  | 1.079168  | -1.734652 |
| 1 | 5.875076  | -0.980533 | -2.867571 |
| 1 | 4.225170  | -1.358112 | -3.380817 |
| 1 | 5.096848  | -1.344673 | 0.677905  |
| 1 | 6.394240  | -0.989402 | -0.469585 |

The atomic coordinates (Å) of *cis*-Cl<sub>2</sub>Ru(PTA)<sub>4</sub>; 2<sub>opt</sub>.

|    |           |           |           |
|----|-----------|-----------|-----------|
| 44 | 0.044793  | 0.028597  | -0.659727 |
| 15 | -0.348985 | 1.824912  | 0.690659  |
| 6  | -1.135376 | 1.667259  | 2.366233  |
| 6  | 1.023665  | 2.958319  | 1.205023  |
| 6  | -1.471531 | 3.151136  | 0.030553  |
| 7  | -1.347256 | 2.958109  | 3.014764  |
| 7  | 0.559203  | 4.096044  | 1.995585  |
| 7  | -1.649874 | 4.256899  | 0.967210  |
| 6  | -2.233975 | 3.813160  | 2.228841  |
| 6  | -0.084507 | 3.659899  | 3.231515  |
| 6  | -0.381289 | 4.924403  | 1.245106  |
| 1  | -2.094654 | 1.156881  | 2.271096  |
| 1  | -0.500499 | 1.052566  | 3.006772  |
| 1  | 1.753565  | 2.393401  | 1.786298  |
| 1  | 1.517784  | 3.322984  | 0.302081  |
| 1  | -1.038540 | 3.515164  | -0.899685 |
| 1  | -2.443692 | 2.724912  | -0.219718 |
| 1  | -2.467068 | 4.696750  | 2.825856  |
| 1  | -3.164157 | 3.278609  | 2.027776  |
| 1  | -0.288152 | 4.544075  | 3.838358  |
| 1  | 0.596830  | 3.009964  | 3.783077  |
| 1  | -0.588973 | 5.819101  | 1.835165  |
| 1  | 0.078340  | 5.227585  | 0.303324  |
| 15 | -2.255021 | -0.365325 | -0.982084 |
| 6  | -3.603549 | 0.045863  | 0.233816  |
| 6  | -3.040106 | 0.412258  | -2.468146 |
| 6  | -2.789651 | -2.110663 | -1.324278 |
| 7  | -4.928465 | -0.311323 | -0.265751 |
| 7  | -4.434104 | 0.008205  | -2.638369 |
| 7  | -4.213827 | -2.208273 | -1.630426 |
| 6  | -5.037656 | -1.746413 | -0.517362 |
| 6  | -5.251711 | 0.407582  | -1.496978 |
| 6  | -4.557892 | -1.435626 | -2.822309 |
| 1  | -3.424860 | -0.479015 | 1.173234  |
| 1  | -3.588051 | 1.113635  | 0.455385  |
| 1  | -2.973720 | 1.496899  | -2.377727 |

|    |           |           |           |
|----|-----------|-----------|-----------|
| 1  | -2.457426 | 0.129572  | -3.345367 |
| 1  | -2.198487 | -2.478945 | -2.161569 |
| 1  | -2.561021 | -2.745192 | -0.466317 |
| 1  | -6.080603 | -1.969939 | -0.749865 |
| 1  | -4.760863 | -2.291993 | 0.386545  |
| 1  | -6.296917 | 0.205952  | -1.739172 |
| 1  | -5.136176 | 1.479628  | -1.329104 |
| 1  | -5.595113 | -1.657104 | -3.081370 |
| 1  | -3.918257 | -1.748394 | -3.648824 |
| 15 | 0.177841  | -1.478381 | 1.032677  |
| 6  | 1.433206  | -1.243729 | 2.379515  |
| 6  | -1.252283 | -1.871596 | 2.158567  |
| 6  | 0.584867  | -3.236686 | 0.605207  |
| 7  | 1.444131  | -2.343749 | 3.339235  |
| 7  | -0.928437 | -2.889929 | 3.153778  |
| 7  | 0.701656  | -4.087118 | 1.787788  |
| 6  | 1.750500  | -3.618359 | 2.690131  |
| 6  | 0.161368  | -2.463229 | 4.026910  |
| 6  | -0.556060 | -4.154612 | 2.524421  |
| 1  | 2.425080  | -1.144868 | 1.939111  |
| 1  | 1.230280  | -0.306335 | 2.901462  |
| 1  | -1.578994 | -0.965836 | 2.669338  |
| 1  | -2.091229 | -2.225948 | 1.558514  |
| 1  | -0.196028 | -3.619389 | -0.053685 |
| 1  | 1.511466  | -3.267173 | 0.034367  |
| 1  | 1.886754  | -4.368951 | 3.470738  |
| 1  | 2.686197  | -3.524518 | 2.136279  |
| 1  | 0.269058  | -3.205436 | 4.819911  |
| 1  | -0.093870 | -1.505786 | 4.483962  |
| 1  | -0.452081 | -4.904884 | 3.310408  |
| 1  | -1.352903 | -4.469438 | 1.848706  |
| 15 | 2.443715  | 0.154565  | -0.829592 |
| 6  | 3.094618  | 0.758878  | -2.457078 |
| 6  | 3.624688  | 1.113220  | 0.245184  |
| 6  | 3.380812  | -1.453179 | -0.795320 |
| 7  | 4.548034  | 0.651184  | -2.558079 |
| 7  | 5.014806  | 0.959185  | -0.179434 |

|    |           |           |           |
|----|-----------|-----------|-----------|
| 7  | 4.798454  | -1.291975 | -1.099280 |
| 6  | 4.998625  | -0.731735 | -2.433593 |
| 6  | 5.215426  | 1.455931  | -1.539528 |
| 6  | 5.457229  | -0.430546 | -0.121743 |
| 1  | 2.616623  | 0.177416  | -3.245587 |
| 1  | 2.789319  | 1.796389  | -2.586043 |
| 1  | 3.367424  | 2.170501  | 0.200999  |
| 1  | 3.523556  | 0.794359  | 1.284874  |
| 1  | 3.287710  | -1.916531 | 0.187292  |
| 1  | 2.916377  | -2.119558 | -1.521980 |
| 1  | 6.066878  | -0.763885 | -2.657394 |
| 1  | 4.471044  | -1.348360 | -3.162903 |
| 1  | 6.287487  | 1.448188  | -1.746282 |
| 1  | 4.857010  | 2.484624  | -1.602692 |
| 1  | 6.530876  | -0.451383 | -0.319015 |
| 1  | 5.284207  | -0.824437 | 0.881328  |
| 17 | 0.379744  | -1.751707 | -2.423620 |
| 17 | -0.013417 | 1.702252  | -2.566508 |

The atomic coordinates (Å) of Ru<sup>2+</sup>(PTA)<sub>4</sub>.

|    |           |           |           |
|----|-----------|-----------|-----------|
| 15 | -0.032167 | 1.612024  | 0.840878  |
| 6  | -1.600099 | 2.063770  | 1.719433  |
| 6  | 1.082665  | 1.623957  | 2.317806  |
| 6  | 0.384796  | 3.284952  | 0.158388  |
| 7  | -1.417333 | 3.242818  | 2.558211  |
| 7  | 0.936246  | 2.861182  | 3.076057  |
| 7  | 0.317002  | 4.302745  | 1.200741  |
| 6  | -1.024706 | 4.410210  | 1.770058  |
| 6  | -0.418859 | 3.016757  | 3.600209  |
| 6  | 1.271985  | 4.037740  | 2.274985  |
| 1  | -2.379682 | 2.265744  | 0.983672  |
| 1  | -1.935113 | 1.225074  | 2.332459  |
| 1  | 0.842235  | 0.777885  | 2.963816  |
| 1  | 2.118345  | 1.507391  | 2.000171  |
| 1  | 1.389360  | 3.262614  | -0.265658 |
| 1  | -0.305303 | 3.528720  | -0.650714 |
| 1  | -1.045474 | 5.281588  | 2.425816  |
| 1  | -1.746573 | 4.562536  | 0.966948  |
| 1  | -0.425914 | 3.879273  | 4.267753  |
| 1  | -0.689076 | 2.131952  | 4.177634  |
| 1  | 1.283733  | 4.903015  | 2.938887  |
| 1  | 2.268346  | 3.914129  | 1.849192  |
| 15 | -2.366468 | -0.029031 | -1.045988 |
| 6  | -3.022531 | 1.497632  | -1.876435 |
| 6  | -2.802323 | -1.240690 | -2.384830 |
| 6  | -3.800722 | -0.361930 | 0.085218  |
| 7  | -4.384340 | 1.298352  | -2.355885 |
| 7  | -4.192102 | -1.098117 | -2.802635 |
| 7  | -5.056729 | -0.320121 | -0.652943 |
| 6  | -5.298403 | 0.988260  | -1.258348 |
| 6  | -4.458993 | 0.230200  | -3.351671 |
| 6  | -5.113447 | -1.344249 | -1.695245 |
| 1  | -3.000377 | 2.339573  | -1.183122 |
| 1  | -2.363559 | 1.745028  | -2.710336 |
| 1  | -2.137365 | -1.072871 | -3.233760 |
| 1  | -2.627905 | -2.255824 | -2.025989 |

|    |           |           |           |
|----|-----------|-----------|-----------|
| 1  | -3.688245 | -1.346883 | 0.539721  |
| 1  | -3.821169 | 0.374891  | 0.889228  |
| 1  | -6.315663 | 0.994376  | -1.652403 |
| 1  | -5.218412 | 1.760128  | -0.491803 |
| 1  | -5.467501 | 0.226852  | -3.767942 |
| 1  | -3.751612 | 0.437230  | -4.155464 |
| 1  | -6.127941 | -1.360345 | -2.096146 |
| 1  | -4.898148 | -2.318822 | -1.255420 |
| 15 | 0.031454  | -1.611051 | 0.842092  |
| 6  | -1.083750 | -1.621583 | 2.318728  |
| 6  | -0.385228 | -3.284611 | 0.161009  |
| 6  | 1.599234  | -2.061838 | 1.721427  |
| 7  | -0.937434 | -2.858091 | 3.078144  |
| 7  | -0.317616 | -4.301375 | 1.204354  |
| 7  | 1.416339  | -3.240123 | 2.561255  |
| 6  | 0.417556  | -3.013059 | 3.602768  |
| 6  | -1.272887 | -4.035465 | 2.278118  |
| 6  | 1.023953  | -4.408263 | 1.774071  |
| 1  | -0.843318 | -0.774940 | 2.963953  |
| 1  | -2.119365 | -1.505125 | 2.000803  |
| 1  | -1.389668 | -3.262813 | -0.263385 |
| 1  | 0.305183  | -3.528966 | -0.647654 |
| 1  | 2.379072  | -2.264312 | 0.986071  |
| 1  | 1.933853  | -1.222489 | 2.333774  |
| 1  | 0.424477  | -3.874890 | 4.271197  |
| 1  | 0.687585  | -2.127624 | 4.179314  |
| 1  | -1.284740 | -4.900069 | 2.942895  |
| 1  | -2.269166 | -3.912348 | 1.852003  |
| 1  | 1.044621  | -5.279006 | 2.430671  |
| 1  | 1.746016  | -4.561343 | 0.971283  |
| 15 | 2.367009  | 0.028141  | -1.046039 |
| 6  | 2.803937  | 1.238544  | -2.385686 |
| 6  | 3.800776  | 0.361445  | 0.085649  |
| 6  | 3.022943  | -1.499361 | -1.874970 |
| 7  | 4.193897  | 1.095188  | -2.802577 |
| 7  | 5.057178  | 0.318569  | -0.651815 |
| 7  | 4.385095  | -1.300987 | -2.353812 |

|    |          |           |           |
|----|----------|-----------|-----------|
| 6  | 4.460657 | -0.233679 | -3.350424 |
| 6  | 5.114747 | 1.341878  | -1.694876 |
| 6  | 5.298690 | -0.990387 | -1.256064 |
| 1  | 2.139405 | 1.070190  | -3.234846 |
| 1  | 2.629531 | 2.254026  | -2.027826 |
| 1  | 3.688429 | 1.346802  | 0.539304  |
| 1  | 3.820418 | -0.374775 | 0.890252  |
| 1  | 2.999968 | -2.340835 | -1.181155 |
| 1  | 2.364356 | -1.747007 | -2.709111 |
| 1  | 5.469391 | -0.230990 | -3.766151 |
| 1  | 3.753624 | -0.441105 | -4.154419 |
| 1  | 6.129438 | 1.357366  | -2.095300 |
| 1  | 4.899501 | 2.316857  | -1.255918 |
| 1  | 6.316146 | -0.997183 | -1.649600 |
| 1  | 5.218018 | -1.761626 | -0.488962 |
| 44 | 0.000033 | -0.000090 | -0.691988 |

The atomic coordinates (Å) of [*trans*-Cl<sub>2</sub>Rh(PTA)<sub>2</sub>]; **3**<sub>XRD</sub>.

|    |          |           |          |
|----|----------|-----------|----------|
| 6  | 4.817000 | 14.960500 | 8.303800 |
| 6  | 7.027200 | 14.559700 | 6.643200 |
| 6  | 4.746700 | 15.804000 | 5.639900 |
| 6  | 6.825500 | 16.930300 | 6.165200 |
| 6  | 4.938200 | 17.265500 | 7.566200 |
| 6  | 6.893300 | 16.208200 | 8.427900 |
| 7  | 5.427500 | 16.279700 | 8.536700 |
| 7  | 7.385600 | 15.929100 | 7.074900 |
| 7  | 5.361200 | 17.026300 | 6.187100 |
| 15 | 5.202000 | 14.306100 | 6.621700 |
| 17 | 5.154000 | 11.421700 | 8.204100 |
| 45 | 4.370100 | 12.239800 | 6.080700 |
| 6  | 3.923200 | 9.519100  | 3.857600 |
| 6  | 1.712900 | 9.919900  | 5.518300 |
| 6  | 3.993500 | 8.675600  | 6.521600 |
| 6  | 1.914600 | 7.549300  | 5.996200 |
| 6  | 3.801900 | 7.214100  | 4.595200 |
| 6  | 1.846800 | 8.271400  | 3.733600 |
| 7  | 3.312700 | 8.199900  | 3.624700 |
| 7  | 1.354600 | 8.550500  | 5.086500 |
| 7  | 3.378900 | 7.453300  | 5.974300 |
| 15 | 3.538200 | 10.173500 | 5.539700 |
| 17 | 3.586100 | 13.057900 | 3.957300 |
| 1  | 5.177259 | 14.245439 | 9.044465 |
| 1  | 3.733172 | 15.035364 | 8.413265 |
| 1  | 7.426935 | 14.378725 | 5.643651 |
| 1  | 7.479242 | 13.833106 | 7.321142 |
| 1  | 3.660496 | 15.909611 | 5.635974 |
| 1  | 5.064291 | 15.662275 | 4.606257 |
| 1  | 7.227840 | 17.904482 | 6.452301 |
| 1  | 7.150605 | 16.708177 | 5.147441 |
| 1  | 5.317010 | 18.245068 | 7.866917 |
| 1  | 3.847731 | 17.289556 | 7.605846 |
| 1  | 7.262054 | 15.439364 | 9.108585 |
| 1  | 7.298658 | 17.173560 | 8.738570 |
| 1  | 3.562941 | 10.234166 | 3.116940 |

|   |          |           |          |
|---|----------|-----------|----------|
| 1 | 5.007030 | 9.444237  | 3.748150 |
| 1 | 1.313227 | 10.100768 | 6.517887 |
| 1 | 1.260820 | 10.646521 | 4.840416 |
| 1 | 5.079692 | 8.569917  | 6.525517 |
| 1 | 3.675862 | 8.817319  | 7.555224 |
| 1 | 1.512265 | 6.575120  | 5.709083 |
| 1 | 1.589480 | 7.771416  | 7.013955 |
| 1 | 3.423042 | 6.234550  | 4.294479 |
| 1 | 4.892372 | 7.189959  | 4.555586 |
| 1 | 1.478050 | 9.040209  | 3.052880 |
| 1 | 1.441486 | 7.306023  | 3.422926 |

The atomic coordinates (Å) of [*trans*-Cl<sub>2</sub>Rh(PTA)<sub>2</sub>]; **3**<sub>opt</sub>.

|    |           |           |           |
|----|-----------|-----------|-----------|
| 45 | -0.000004 | -0.000204 | 0.999996  |
| 15 | 2.288102  | -0.000163 | 0.938235  |
| 6  | 3.252946  | -0.000107 | -0.641655 |
| 6  | 3.198920  | 1.387805  | 1.763696  |
| 6  | 3.199190  | -1.387910 | 1.763770  |
| 7  | 4.701459  | 0.000041  | -0.414919 |
| 7  | 4.653326  | 1.225494  | 1.706451  |
| 7  | 4.653563  | -1.225312 | 1.706510  |
| 6  | 5.128207  | -1.185920 | 0.324507  |
| 6  | 5.127976  | 1.186122  | 0.324447  |
| 6  | 5.078929  | 0.000149  | 2.380097  |
| 1  | 2.973599  | -0.878437 | -1.226874 |
| 1  | 2.973421  | 0.878136  | -1.226914 |
| 1  | 2.918327  | 2.328002  | 1.283750  |
| 1  | 2.872324  | 1.438850  | 2.804188  |
| 1  | 2.872607  | -1.438962 | 2.804265  |
| 1  | 2.918785  | -2.328191 | 1.283880  |
| 1  | 4.780390  | -2.078289 | -0.198735 |
| 1  | 6.220383  | -1.197853 | 0.341974  |
| 1  | 4.779992  | 2.078399  | -0.198841 |
| 1  | 6.220150  | 1.198263  | 0.341911  |
| 1  | 4.691441  | 0.000135  | 3.400344  |
| 1  | 6.170447  | 0.000257  | 2.423376  |
| 15 | -2.288102 | -0.000188 | 1.061760  |
| 6  | -3.198921 | 1.388056  | 0.236764  |
| 6  | -3.199193 | -1.387659 | 0.235766  |
| 6  | -3.252941 | -0.000657 | 2.641652  |
| 7  | -4.653327 | 1.225727  | 0.293959  |
| 7  | -4.653565 | -1.225079 | 0.293084  |
| 7  | -4.701456 | -0.000432 | 2.414922  |
| 6  | -5.127974 | 1.185895  | 1.675951  |
| 6  | -5.078932 | 0.000606  | -0.380093 |
| 6  | -5.128207 | -1.186147 | 1.675102  |
| 1  | -2.918326 | 2.328092  | 0.717022  |
| 1  | -2.872329 | 1.439448  | -0.803713 |
| 1  | -2.872613 | -1.438367 | -0.804747 |

|    |           |           |           |
|----|-----------|-----------|-----------|
| 1  | -2.918787 | -2.328100 | 0.715343  |
| 1  | -2.973593 | -0.879181 | 3.226579  |
| 1  | -2.973414 | 0.877392  | 3.227202  |
| 1  | -4.779988 | 2.077998  | 2.199534  |
| 1  | -6.220147 | 1.198043  | 1.658493  |
| 1  | -4.691447 | 0.000931  | -1.400341 |
| 1  | -6.170451 | 0.000728  | -0.423370 |
| 1  | -4.780389 | -2.078690 | 2.198046  |
| 1  | -6.220383 | -1.198074 | 1.657633  |
| 17 | -0.170569 | 0.000103  | -1.393555 |
| 17 | 0.170573  | -0.000747 | 3.393545  |

The atomic coordinates (Å) of Rh<sup>+</sup>(PTA)<sub>2</sub>.

|    |           |           |           |
|----|-----------|-----------|-----------|
| 45 | 0.000000  | 0.000000  | 1.000000  |
| 15 | 2.382554  | 0.000000  | 1.000000  |
| 6  | 3.302010  | 0.274472  | -0.587074 |
| 6  | 3.302010  | 1.237211  | 2.031236  |
| 6  | 3.302010  | -1.511682 | 1.555838  |
| 7  | 4.749841  | 0.240927  | -0.393108 |
| 7  | 4.749841  | 1.086003  | 1.905203  |
| 7  | 4.749841  | -1.326930 | 1.487905  |
| 6  | 5.193524  | -1.053730 | 0.121695  |
| 6  | 5.193524  | 1.287500  | 0.526595  |
| 6  | 5.193524  | -0.233769 | 2.351710  |
| 1  | 3.007050  | -0.494676 | -1.303285 |
| 1  | 3.006671  | 1.240013  | -1.001865 |
| 1  | 3.007050  | 2.242041  | 1.723240  |
| 1  | 3.006671  | 1.113660  | 3.074815  |
| 1  | 3.007050  | -1.747365 | 2.580044  |
| 1  | 3.006671  | -2.353673 | 0.927050  |
| 1  | 4.832969  | -1.844882 | -0.537746 |
| 1  | 6.284667  | -1.064269 | 0.112911  |
| 1  | 4.832969  | 2.254168  | 0.171158  |
| 1  | 6.284667  | 1.300377  | 0.521861  |
| 1  | 4.832969  | -0.409286 | 3.366588  |
| 1  | 6.284667  | -0.236107 | 2.365229  |
| 15 | -2.382554 | 0.000000  | 1.000000  |
| 6  | -3.302010 | 1.394849  | 0.194683  |
| 6  | -3.302010 | -1.394849 | 0.194683  |
| 6  | -3.302010 | 0.000000  | 2.610633  |
| 7  | -4.749841 | 1.224376  | 0.293106  |
| 7  | -4.749841 | -1.224376 | 0.293106  |
| 7  | -4.749841 | 0.000000  | 2.413788  |
| 6  | -5.193524 | 1.187993  | 1.685886  |
| 6  | -5.193524 | -0.000002 | -0.371775 |
| 6  | -5.193524 | -1.187991 | 1.685889  |
| 1  | -3.007050 | 2.332495  | 0.669410  |
| 1  | -3.006671 | 1.450944  | -0.854685 |
| 1  | -3.007050 | -1.452547 | -0.854705 |

|   |           |           |           |
|---|-----------|-----------|-----------|
| 1 | -3.006671 | -2.331677 | 0.670788  |
| 1 | -3.007050 | -0.879948 | 3.185295  |
| 1 | -3.006671 | 0.880733  | 3.183897  |
| 1 | -4.832969 | 2.079951  | 2.200856  |
| 1 | -6.284667 | 1.199875  | 1.692746  |
| 1 | -4.832969 | -0.000004 | -1.401719 |
| 1 | -6.284667 | -0.000002 | -0.385495 |
| 1 | -4.832969 | -2.079948 | 2.200862  |
| 1 | -6.284667 | -1.199873 | 1.692749  |

The atomic coordinates (Å) of Ni(PTA)<sub>4</sub>; **4**<sub>opt</sub>.

|    |           |           |           |
|----|-----------|-----------|-----------|
| 28 | -0.032037 | -0.009849 | -0.004347 |
| 15 | -0.676775 | 2.044957  | 0.091613  |
| 6  | -1.435064 | 2.884522  | -1.385043 |
| 6  | -1.980225 | 2.587952  | 1.302628  |
| 6  | 0.522421  | 3.411362  | 0.485630  |
| 7  | -1.817491 | 4.279416  | -1.150657 |
| 7  | -2.301785 | 4.015958  | 1.236940  |
| 7  | -0.078555 | 4.747436  | 0.511158  |
| 6  | -0.658407 | 5.090808  | -0.785605 |
| 6  | -2.810000 | 4.382889  | -0.082975 |
| 6  | -1.126902 | 4.835894  | 1.525179  |
| 1  | -0.721072 | 2.841880  | -2.211954 |
| 1  | -2.316356 | 2.315038  | -1.692287 |
| 1  | -2.887632 | 2.006554  | 1.118308  |
| 1  | -1.639838 | 2.340322  | 2.311688  |
| 1  | 0.976933  | 3.203276  | 1.458001  |
| 1  | 1.326151  | 3.390841  | -0.255304 |
| 1  | -0.964785 | 6.138537  | -0.750405 |
| 1  | 0.102772  | 4.978068  | -1.560678 |
| 1  | -3.157989 | 5.417485  | -0.046133 |
| 1  | -3.660235 | 3.739373  | -0.319259 |
| 1  | -1.452224 | 5.875878  | 1.598951  |
| 1  | -0.706206 | 4.535199  | 2.487177  |
| 15 | -1.755608 | -1.298782 | -0.127149 |
| 6  | -2.261489 | -2.076497 | -1.739485 |
| 6  | -1.859069 | -2.863558 | 0.873429  |
| 6  | -3.452096 | -0.680655 | 0.320323  |
| 7  | -3.453671 | -2.923450 | -1.648435 |
| 7  | -3.096180 | -3.622637 | 0.672751  |
| 7  | -4.511348 | -1.683452 | 0.181398  |
| 6  | -4.613067 | -2.156973 | -1.197426 |
| 6  | -3.243493 | -4.033704 | -0.721673 |
| 6  | -4.267215 | -2.833485 | 1.049106  |
| 1  | -2.441361 | -1.280011 | -2.466563 |
| 1  | -1.424024 | -2.670677 | -2.114968 |
| 1  | -1.004359 | -3.495381 | 0.617194  |

|    |           |           |           |
|----|-----------|-----------|-----------|
| 1  | -1.761383 | -2.605059 | 1.931267  |
| 1  | -3.428946 | -0.323344 | 1.353366  |
| 1  | -3.684639 | 0.180455  | -0.311973 |
| 1  | -5.499063 | -2.791372 | -1.270855 |
| 1  | -4.743753 | -1.300659 | -1.862625 |
| 1  | -4.103266 | -4.702915 | -0.797766 |
| 1  | -2.348174 | -4.584508 | -1.018087 |
| 1  | -5.140437 | -3.488428 | 1.012029  |
| 1  | -4.145277 | -2.475993 | 2.073886  |
| 15 | 1.134548  | -0.479440 | 1.746563  |
| 6  | 2.831524  | 0.241656  | 1.992889  |
| 6  | 0.512713  | -0.075890 | 3.452686  |
| 6  | 1.620089  | -2.232313 | 2.136522  |
| 7  | 3.487207  | -0.179054 | 3.233857  |
| 7  | 1.427287  | -0.461147 | 4.530669  |
| 7  | 2.411026  | -2.376809 | 3.361454  |
| 6  | 3.663521  | -1.629048 | 3.272916  |
| 6  | 2.711285  | 0.224814  | 4.404567  |
| 6  | 1.669910  | -1.902276 | 4.527927  |
| 1  | 3.455846  | -0.044049 | 1.142019  |
| 1  | 2.749676  | 1.331838  | 1.979160  |
| 1  | 0.325820  | 0.999960  | 3.507473  |
| 1  | -0.448385 | -0.576406 | 3.598155  |
| 1  | 0.710233  | -2.832292 | 2.223547  |
| 1  | 2.187481  | -2.630553 | 1.291030  |
| 1  | 4.268975  | -1.882153 | 4.145960  |
| 1  | 4.203563  | -1.937807 | 2.375217  |
| 1  | 3.308213  | 0.011310  | 5.293912  |
| 1  | 2.527762  | 1.300546  | 4.360278  |
| 1  | 2.240170  | -2.149217 | 5.426072  |
| 1  | 0.713322  | -2.427702 | 4.569282  |
| 15 | 1.247298  | -0.282272 | -1.717885 |
| 6  | 0.554509  | -0.283794 | -3.444276 |
| 6  | 2.637344  | 0.900452  | -2.077496 |
| 6  | 2.261563  | -1.827926 | -1.924292 |
| 7  | 1.558688  | -0.480984 | -4.492921 |
| 7  | 3.408978  | 0.571043  | -3.278740 |

|   |           |           |           |
|---|-----------|-----------|-----------|
| 7 | 3.075153  | -1.852716 | -3.142641 |
| 6 | 2.239160  | -1.764760 | -4.338094 |
| 6 | 2.562417  | 0.580956  | -4.469677 |
| 6 | 4.029948  | -0.746800 | -3.162922 |
| 1 | -0.198107 | -1.073745 | -3.514504 |
| 1 | 0.039399  | 0.666014  | -3.611348 |
| 1 | 2.218503  | 1.904773  | -2.183784 |
| 1 | 3.306260  | 0.921536  | -1.212919 |
| 1 | 2.914933  | -1.931974 | -1.053851 |
| 1 | 1.586241  | -2.687765 | -1.923278 |
| 1 | 2.878686  | -1.926351 | -5.208576 |
| 1 | 1.486612  | -2.555758 | -4.309194 |
| 1 | 3.198668  | 0.461922  | -5.349368 |
| 1 | 2.061983  | 1.549710  | -4.532317 |
| 1 | 4.698140  | -0.880125 | -4.016494 |
| 1 | 4.624865  | -0.784427 | -2.247771 |

The atomic coordinates (Å) of Pd(PTA)<sub>4</sub>; 5<sub>opt</sub>.

|    |           |           |           |
|----|-----------|-----------|-----------|
| 46 | -0.034746 | -0.010919 | -0.001110 |
| 15 | -0.734444 | 2.213239  | 0.023473  |
| 6  | -1.420305 | 3.022185  | -1.504776 |
| 6  | -2.094032 | 2.780794  | 1.159143  |
| 6  | 0.445606  | 3.587615  | 0.446457  |
| 7  | -1.812357 | 4.421508  | -1.317689 |
| 7  | -2.410866 | 4.207067  | 1.048815  |
| 7  | -0.154768 | 4.923811  | 0.415697  |
| 6  | -0.671440 | 5.240399  | -0.914164 |
| 6  | -2.854862 | 4.546741  | -0.301220 |
| 6  | -1.250486 | 5.032921  | 1.376218  |
| 1  | -0.667522 | 2.962677  | -2.295397 |
| 1  | -2.286289 | 2.446401  | -1.842193 |
| 1  | -2.992007 | 2.195618  | 0.943469  |
| 1  | -1.802668 | 2.553996  | 2.188208  |
| 1  | 0.852752  | 3.399615  | 1.443548  |
| 1  | 1.283913  | 3.552002  | -0.254456 |
| 1  | -0.978283 | 6.288610  | -0.915213 |
| 1  | 0.125975  | 5.111871  | -1.649358 |
| 1  | -3.203358 | 5.581850  | -0.302356 |
| 1  | -3.693338 | 3.898365  | -0.564784 |
| 1  | -1.578108 | 6.074179  | 1.412939  |
| 1  | -0.876673 | 4.752097  | 2.363286  |
| 15 | -1.898543 | -1.411754 | -0.032382 |
| 6  | -2.359713 | -2.364173 | -1.562273 |
| 6  | -2.035641 | -2.855506 | 1.132576  |
| 6  | -3.605456 | -0.748161 | 0.293872  |
| 7  | -3.556510 | -3.196055 | -1.412411 |
| 7  | -3.268620 | -3.632532 | 0.981569  |
| 7  | -4.663171 | -1.760464 | 0.236503  |
| 6  | -4.726235 | -2.384483 | -1.083471 |
| 6  | -3.376616 | -4.196240 | -0.362185 |
| 6  | -4.447737 | -2.806745 | 1.233493  |
| 1  | -2.516036 | -1.653605 | -2.378337 |
| 1  | -1.513494 | -2.996183 | -1.844733 |
| 1  | -1.175759 | -3.511651 | 0.973257  |

|    |           |           |           |
|----|-----------|-----------|-----------|
| 1  | -1.967937 | -2.480896 | 2.157461  |
| 1  | -3.611241 | -0.278137 | 1.280963  |
| 1  | -3.816986 | 0.037158  | -0.436767 |
| 1  | -5.611624 | -3.023380 | -1.111702 |
| 1  | -4.835019 | -1.607515 | -1.843331 |
| 1  | -4.235818 | -4.870022 | -0.388424 |
| 1  | -2.474682 | -4.776361 | -0.569254 |
| 1  | -5.321475 | -3.462010 | 1.244031  |
| 1  | -4.354531 | -2.337405 | 2.215294  |
| 15 | 1.278350  | -0.433459 | 1.878861  |
| 6  | 3.053848  | 0.116281  | 1.954628  |
| 6  | 0.806897  | 0.233126  | 3.550309  |
| 6  | 1.598370  | -2.172391 | 2.456830  |
| 7  | 3.735073  | -0.228094 | 3.205287  |
| 7  | 1.738984  | -0.124294 | 4.622818  |
| 7  | 2.442093  | -2.261245 | 3.651420  |
| 6  | 3.759022  | -1.674260 | 3.412978  |
| 6  | 3.078381  | 0.393808  | 4.353200  |
| 6  | 1.827157  | -1.574011 | 4.784852  |
| 1  | 3.591879  | -0.334756 | 1.116539  |
| 1  | 3.087120  | 1.199673  | 1.811584  |
| 1  | 0.738533  | 1.322141  | 3.481908  |
| 1  | -0.191178 | -0.135957 | 3.801171  |
| 1  | 0.637102  | -2.652178 | 2.659491  |
| 1  | 2.068318  | -2.727461 | 1.640525  |
| 1  | 4.385935  | -1.890422 | 4.280822  |
| 1  | 4.208161  | -2.144060 | 2.535218  |
| 1  | 3.702005  | 0.219579  | 5.232767  |
| 1  | 3.007361  | 1.470860  | 4.186423  |
| 1  | 2.421307  | -1.777219 | 5.678493  |
| 1  | 0.824576  | -1.980317 | 4.935341  |
| 15 | 1.307031  | -0.382985 | -1.871473 |
| 6  | 0.560397  | -0.615277 | -3.559348 |
| 6  | 2.581994  | 0.862874  | -2.403122 |
| 6  | 2.438237  | -1.856729 | -1.965248 |
| 7  | 1.542417  | -0.838535 | -4.623587 |
| 7  | 3.338311  | 0.474586  | -3.596448 |

|   |           |           |           |
|---|-----------|-----------|-----------|
| 7 | 3.210604  | -1.941385 | -3.207461 |
| 6 | 2.331385  | -2.042095 | -4.370449 |
| 6 | 2.455156  | 0.296118  | -4.746792 |
| 6 | 4.069547  | -0.771419 | -3.376283 |
| 1 | -0.126231 | -1.465162 | -3.520092 |
| 1 | -0.036641 | 0.268872  | -3.798367 |
| 1 | 2.078331  | 1.814876  | -2.591053 |
| 1 | 3.274898  | 1.024762  | -1.573073 |
| 1 | 3.126191  | -1.819553 | -1.116342 |
| 1 | 1.836710  | -2.762551 | -1.851413 |
| 1 | 2.953146  | -2.240666 | -5.246168 |
| 1 | 1.648128  | -2.882950 | -4.232527 |
| 1 | 3.069837  | 0.138551  | -5.635747 |
| 1 | 1.874563  | 1.210917  | -4.884467 |
| 1 | 4.718083  | -0.937974 | -4.239163 |
| 1 | 4.695296  | -0.668422 | -2.487052 |

The atomic coordinates (Å) of Pt(PTA)<sub>4</sub>; 6<sub>opt</sub>.

|    |           |           |           |
|----|-----------|-----------|-----------|
| 78 | 0.097411  | -0.012282 | -0.007690 |
| 15 | -0.627307 | 2.100166  | -0.586082 |
| 6  | -0.558158 | 3.491770  | 0.639299  |
| 6  | 0.126325  | 3.038646  | -1.998476 |
| 6  | -2.394198 | 2.360989  | -1.089395 |
| 7  | -1.086674 | 4.756153  | 0.122104  |
| 7  | -0.479780 | 4.354096  | -2.217766 |
| 7  | -2.714650 | 3.753285  | -1.411311 |
| 6  | -2.491294 | 4.626063  | -0.260434 |
| 6  | -0.328136 | 5.209011  | -1.042155 |
| 6  | -1.903394 | 4.237288  | -2.526533 |
| 1  | -1.119859 | 3.198268  | 1.530154  |
| 1  | 0.482379  | 3.627856  | 0.945640  |
| 1  | 1.194977  | 3.158053  | -1.803145 |
| 1  | 0.028922  | 2.434672  | -2.904412 |
| 1  | -2.604230 | 1.728828  | -1.956282 |
| 1  | -3.038212 | 2.015187  | -0.276617 |
| 1  | -2.866383 | 5.620674  | -0.512626 |
| 1  | -3.059507 | 4.246710  | 0.590947  |
| 1  | -0.677618 | 6.210192  | -1.304879 |
| 1  | 0.729258  | 5.269190  | -0.778092 |
| 1  | -2.270567 | 5.227201  | -2.807210 |
| 1  | -2.030352 | 3.566193  | -3.378027 |
| 15 | 2.386474  | -0.148780 | -0.079524 |
| 6  | 3.371707  | -0.333871 | 1.482984  |
| 6  | 3.234853  | -1.511012 | -1.012947 |
| 6  | 3.397725  | 1.237428  | -0.788359 |
| 7  | 4.818261  | -0.402604 | 1.263434  |
| 7  | 4.696947  | -1.445311 | -0.950986 |
| 7  | 4.841485  | 0.992847  | -0.750928 |
| 6  | 5.312948  | 0.813162  | 0.620578  |
| 6  | 5.172739  | -1.547389 | 0.427158  |
| 6  | 5.195782  | -0.196437 | -1.522951 |
| 1  | 3.142218  | 0.512853  | 2.135279  |
| 1  | 3.036011  | -1.238797 | 1.996907  |
| 1  | 2.895971  | -2.468364 | -0.608382 |

|    |           |           |           |
|----|-----------|-----------|-----------|
| 1  | 2.910527  | -1.467148 | -2.056314 |
| 1  | 3.082817  | 1.398591  | -1.822708 |
| 1  | 3.166757  | 2.150788  | -0.233218 |
| 1  | 6.404156  | 0.764198  | 0.599120  |
| 1  | 5.016475  | 1.678289  | 1.216480  |
| 1  | 6.262294  | -1.624393 | 0.403791  |
| 1  | 4.770658  | -2.456772 | 0.877544  |
| 1  | 6.285655  | -0.257336 | -1.568778 |
| 1  | 4.811532  | -0.090198 | -2.539069 |
| 15 | -0.893539 | -1.508488 | -1.456622 |
| 6  | -2.661617 | -2.006873 | -1.194600 |
| 6  | -1.062235 | -1.106287 | -3.260199 |
| 6  | -0.231637 | -3.225907 | -1.694520 |
| 7  | -3.163187 | -2.945808 | -2.200370 |
| 7  | -1.744645 | -2.146915 | -4.032598 |
| 7  | -1.008884 | -4.026934 | -2.643377 |
| 6  | -2.390841 | -4.186631 | -2.195681 |
| 6  | -3.103412 | -2.365754 | -3.540581 |
| 6  | -1.018221 | -3.413623 | -3.969913 |
| 1  | -2.751772 | -2.454340 | -0.201102 |
| 1  | -3.277155 | -1.103479 | -1.197151 |
| 1  | -1.607970 | -0.163810 | -3.355950 |
| 1  | -0.062386 | -0.941951 | -3.670404 |
| 1  | 0.802512  | -3.153395 | -2.040615 |
| 1  | -0.212898 | -3.725428 | -0.722369 |
| 1  | -2.883780 | -4.894246 | -2.866375 |
| 1  | -2.393765 | -4.605104 | -1.187506 |
| 1  | -3.605574 | -3.050356 | -4.228102 |
| 1  | -3.641115 | -1.415811 | -3.542656 |
| 1  | -1.495476 | -4.111574 | -4.661730 |
| 1  | 0.010875  | -3.251722 | -4.295772 |
| 15 | -0.702378 | -0.462436 | 2.108764  |
| 6  | 0.134499  | 0.188708  | 3.631635  |
| 6  | -2.416886 | 0.072429  | 2.574712  |
| 6  | -0.867274 | -2.212302 | 2.703106  |
| 7  | -0.535631 | -0.193854 | 4.876989  |
| 7  | -2.797751 | -0.297455 | 3.939609  |

|   |           |           |          |
|---|-----------|-----------|----------|
| 7 | -1.423831 | -2.324059 | 4.053252 |
| 6 | -0.575636 | -1.646595 | 5.031821 |
| 6 | -1.904700 | 0.315481  | 4.921003 |
| 6 | -2.764946 | -1.747256 | 4.122312 |
| 1 | 1.163747  | -0.178670 | 3.644065 |
| 1 | 0.181131  | 1.278541  | 3.560381 |
| 1 | -2.484886 | 1.157449  | 2.458348 |
| 1 | -3.119940 | -0.371304 | 1.864910 |
| 1 | -1.501408 | -2.759084 | 2.000110 |
| 1 | 0.120849  | -2.678971 | 2.674456 |
| 1 | -0.964234 | -1.869788 | 6.028162 |
| 1 | 0.439240  | -2.041751 | 4.959174 |
| 1 | -2.307927 | 0.115333  | 5.916417 |
| 1 | -1.889363 | 1.395594  | 4.764087 |
| 1 | -3.180027 | -1.973343 | 5.107256 |
| 1 | -3.394931 | -2.216773 | 3.364499 |

The atomic coordinates (Å) of Cl<sub>2</sub>Ni(PTA)<sub>2</sub>; *cis-7*<sub>opt</sub>.

|    |           |           |           |
|----|-----------|-----------|-----------|
| 28 | 0.782580  | 3.134143  | 9.661214  |
| 15 | 0.404226  | 1.669686  | 11.253501 |
| 15 | 1.817960  | 1.709630  | 8.329828  |
| 17 | -0.015378 | 4.735057  | 10.982260 |
| 17 | 0.802200  | 4.488285  | 7.880560  |
| 7  | 1.255781  | -0.123818 | 13.136382 |
| 7  | -0.791576 | -0.704710 | 11.921080 |
| 7  | -0.831458 | 1.043539  | 13.624964 |
| 7  | 3.169068  | -0.596811 | 7.683393  |
| 7  | 3.789076  | 1.409650  | 6.446431  |
| 7  | 1.651598  | 0.304230  | 5.990674  |
| 6  | 1.780518  | 0.841336  | 12.175133 |
| 6  | 2.773115  | 1.072150  | 5.449632  |
| 6  | -0.584896 | 0.176167  | 10.776453 |
| 6  | -0.608893 | 2.169026  | 12.723580 |
| 6  | 0.475103  | -1.173920 | 12.482662 |
| 6  | 0.424926  | 0.518871  | 14.152611 |
| 6  | 2.588302  | 0.092105  | 8.831461  |
| 6  | 3.293574  | 2.373669  | 7.421779  |
| 6  | 0.829752  | 1.108865  | 6.888422  |
| 6  | 4.250428  | 0.180181  | 7.082977  |
| 6  | -1.559162 | -0.042311 | 12.974154 |
| 6  | 2.170179  | -0.888851 | 6.656564  |
| 1  | -2.486707 | 0.346091  | 12.551872 |
| 1  | -1.806911 | -0.787305 | 13.732096 |
| 1  | 3.375693  | 0.292096  | 9.560089  |
| 1  | 1.854884  | -0.561324 | 9.303058  |
| 1  | 3.000961  | 3.296609  | 6.925729  |
| 1  | 4.075501  | 2.608234  | 8.145888  |
| 1  | -0.017083 | 0.521348  | 7.247108  |
| 1  | 0.436169  | 1.979286  | 6.363141  |
| 1  | 4.730064  | -0.439136 | 6.323245  |
| 1  | 4.987636  | 0.424335  | 7.848989  |
| 1  | 1.342196  | -1.440036 | 7.104520  |
| 1  | 2.640237  | -1.521977 | 5.902368  |
| 1  | 3.249927  | 0.471687  | 4.673090  |

|   |           |           |           |
|---|-----------|-----------|-----------|
| 1 | 2.394233  | 1.989375  | 4.997345  |
| 1 | 2.453342  | 0.336108  | 11.485154 |
| 1 | 2.358890  | 1.608071  | 12.693309 |
| 1 | -1.547395 | 0.514312  | 10.388610 |
| 1 | -0.093760 | -0.374958 | 9.974904  |
| 1 | -0.089974 | 2.971023  | 13.246719 |
| 1 | -1.561261 | 2.567374  | 12.373845 |
| 1 | 0.249794  | -1.938721 | 13.227493 |
| 1 | 1.074205  | -1.629646 | 11.692803 |
| 1 | 0.189144  | -0.224480 | 14.916017 |
| 1 | 0.987770  | 1.328835  | 14.618175 |

The atomic coordinates (Å) of Cl<sub>2</sub>Ni(PTA)<sub>2</sub>; *trans*-7<sub>opt</sub>.

|    |           |           |           |
|----|-----------|-----------|-----------|
| 28 | 0.000000  | 0.000000  | 0.000000  |
| 15 | -0.774447 | 2.018835  | -0.554416 |
| 17 | 1.062316  | 0.788331  | 1.747684  |
| 7  | -0.994158 | 3.967448  | -2.467946 |
| 7  | -2.968992 | 3.576248  | -1.072189 |
| 7  | -1.013996 | 4.715011  | -0.136337 |
| 6  | 2.609373  | -2.228705 | 0.634866  |
| 6  | 0.376073  | -3.527430 | -0.432968 |
| 6  | 2.451730  | -3.864113 | 2.409349  |
| 6  | 0.555654  | -4.972476 | 1.500031  |
| 6  | 2.470564  | -4.593120 | 0.146855  |
| 6  | -2.609373 | 2.228705  | -0.634866 |
| 6  | -0.376073 | 3.527430  | 0.432968  |
| 6  | -2.451730 | 3.864113  | -2.409349 |
| 6  | -0.555654 | 4.972476  | -1.500031 |
| 6  | -2.470564 | 4.593120  | -0.146855 |
| 6  | -0.353230 | 2.675586  | -2.230110 |
| 15 | 0.774447  | -2.018835 | 0.554416  |
| 17 | -1.062316 | -0.788331 | -1.747684 |
| 7  | 0.994158  | -3.967448 | 2.467946  |
| 7  | 2.968992  | -3.576248 | 1.072189  |
| 7  | 1.013996  | -4.715011 | 0.136337  |
| 6  | 0.353230  | -2.675586 | 2.230110  |
| 1  | -0.730136 | -2.779972 | 2.310116  |
| 1  | 0.676755  | -1.952596 | 2.979935  |
| 1  | 3.015091  | -1.488831 | 1.326005  |
| 1  | 3.033652  | -2.034220 | -0.351707 |
| 1  | 0.730136  | 2.779972  | -2.310116 |
| 1  | -0.676755 | 1.952596  | -2.979935 |
| 1  | -3.015091 | 1.488831  | -1.326005 |
| 1  | -3.033652 | 2.034220  | 0.351707  |
| 1  | -0.711952 | 3.380254  | 1.460453  |
| 1  | 0.706310  | 3.661811  | 0.459037  |
| 1  | -2.870319 | 4.818343  | -2.734571 |
| 1  | -2.784207 | 3.086099  | -3.098017 |
| 1  | 0.533852  | 5.027668  | -1.508996 |

|   |           |           |           |
|---|-----------|-----------|-----------|
| 1 | -0.955190 | 5.938775  | -1.813479 |
| 1 | -2.887434 | 5.556100  | -0.447695 |
| 1 | -2.819482 | 4.363254  | 0.860843  |
| 1 | 2.887434  | -5.556100 | 0.447695  |
| 1 | 2.819482  | -4.363254 | -0.860843 |
| 1 | -0.533852 | -5.027668 | 1.508996  |
| 1 | 0.955190  | -5.938775 | 1.813479  |
| 1 | 2.870319  | -4.818343 | 2.734571  |
| 1 | 2.784207  | -3.086099 | 3.098017  |
| 1 | 0.711952  | -3.380254 | -1.460453 |
| 1 | -0.706310 | -3.661811 | -0.459037 |

The atomic coordinates (Å) of Cl<sub>2</sub>Pd(PTA)<sub>2</sub>; *cis*-**8**<sub>XRD</sub>.

|    |           |           |           |
|----|-----------|-----------|-----------|
| 46 | -0.861100 | -4.263700 | 9.873200  |
| 17 | -2.344400 | -5.376100 | 11.313100 |
| 17 | -2.720000 | -3.539300 | 8.588700  |
| 15 | 0.509500  | -3.255100 | 8.393500  |
| 15 | 0.823800  | -4.928100 | 11.194300 |
| 7  | 2.663000  | -1.711900 | 7.681900  |
| 7  | 2.026300  | -3.513000 | 6.119800  |
| 7  | 0.640200  | -1.478800 | 6.286800  |
| 7  | 2.823200  | -4.299900 | 12.934300 |
| 7  | 1.608000  | -6.387000 | 13.371900 |
| 7  | 3.177400  | -6.277100 | 11.487400 |
| 6  | 2.002500  | -2.277300 | 8.860200  |
| 6  | 1.262500  | -4.322200 | 7.083200  |
| 6  | -0.284700 | -2.003200 | 7.288500  |
| 6  | 3.105200  | -2.768500 | 6.781900  |
| 6  | 1.165700  | -2.548600 | 5.438600  |
| 6  | 1.781200  | -0.820500 | 6.945000  |
| 6  | 1.784000  | -3.665900 | 12.136000 |
| 6  | 0.393500  | -6.049100 | 12.606200 |
| 6  | 2.197600  | -5.918000 | 10.458800 |
| 6  | 2.247200  | -5.201000 | 13.936100 |
| 6  | 2.585700  | -7.082500 | 12.544800 |
| 6  | 3.761100  | -5.079600 | 12.103400 |
| 1  | 1.702753  | -1.476420 | 9.538383  |
| 1  | 2.717771  | -2.909613 | 9.387611  |
| 1  | 1.914092  | -5.071013 | 7.534678  |
| 1  | 0.461012  | -4.852753 | 6.567293  |
| 1  | -1.132779 | -2.478411 | 6.801119  |
| 1  | -0.675581 | -1.190680 | 7.902358  |
| 1  | 3.736365  | -3.468628 | 7.331111  |
| 1  | 3.711732  | -2.308315 | 5.999867  |
| 1  | 0.330275  | -3.079713 | 4.979641  |
| 1  | 1.752531  | -2.083907 | 4.644077  |
| 1  | 2.374638  | -0.332065 | 6.169993  |
| 1  | 1.401129  | -0.052057 | 7.619408  |
| 1  | 2.230005  | -2.939987 | 11.458202 |

|   |           |           |           |
|---|-----------|-----------|-----------|
| 1 | 1.092506  | -3.122432 | 12.782015 |
| 1 | -0.327391 | -5.547547 | 13.248310 |
| 1 | -0.070000 | -6.955058 | 12.219831 |
| 1 | 1.777651  | -6.816990 | 10.005264 |
| 1 | 2.695565  | -5.351256 | 9.671038  |
| 1 | 3.054045  | -5.533375 | 14.591148 |
| 1 | 1.521037  | -4.650047 | 14.535327 |
| 1 | 3.393712  | -7.422477 | 13.195289 |
| 1 | 2.115273  | -7.961643 | 12.101040 |
| 1 | 4.167890  | -4.433721 | 11.324147 |
| 1 | 4.580856  | -5.400546 | 12.746966 |

The atomic coordinates (Å) of Cl<sub>2</sub>Pd(PTA)<sub>2</sub>; *cis*-**8**<sub>opt</sub>.

|    |           |           |           |
|----|-----------|-----------|-----------|
| 46 | -0.760614 | -4.613079 | 9.655231  |
| 17 | -2.295044 | -5.897007 | 10.952089 |
| 17 | -2.418098 | -4.309635 | 7.951949  |
| 15 | 0.564268  | -3.384579 | 8.285747  |
| 15 | 0.851287  | -5.020671 | 11.188302 |
| 7  | 2.817524  | -2.025550 | 7.535781  |
| 7  | 1.702386  | -3.346354 | 5.806849  |
| 7  | 0.707781  | -1.249174 | 6.590042  |
| 7  | 2.703740  | -4.158313 | 12.997200 |
| 7  | 1.579206  | -6.261906 | 13.514954 |
| 7  | 3.257275  | -6.187391 | 11.741210 |
| 6  | 2.244014  | -2.710365 | 8.690018  |
| 6  | 0.978388  | -4.240646 | 6.704458  |
| 6  | -0.163652 | -1.823068 | 7.609790  |
| 6  | 2.972861  | -2.917179 | 6.387224  |
| 6  | 0.910087  | -2.164169 | 5.466686  |
| 6  | 2.009066  | -0.875683 | 7.135680  |
| 6  | 1.696801  | -3.637708 | 12.077606 |
| 6  | 0.414202  | -6.051238 | 12.662330 |
| 6  | 2.331617  | -5.979286 | 10.631958 |
| 6  | 2.109343  | -5.002917 | 14.031362 |
| 6  | 2.645509  | -6.971851 | 12.813061 |
| 6  | 3.736330  | -4.921827 | 12.296751 |
| 1  | 2.153810  | -2.002239 | 9.514654  |
| 1  | 2.913352  | -3.512293 | 9.001785  |
| 1  | 1.581283  | -5.123652 | 6.923152  |
| 1  | 0.047582  | -4.571701 | 6.243072  |
| 1  | -1.139982 | -2.056045 | 7.189060  |
| 1  | -0.303816 | -1.113603 | 8.426902  |
| 1  | 3.546920  | -3.795117 | 6.686105  |
| 1  | 3.533738  | -2.380653 | 5.620443  |
| 1  | -0.059865 | -2.481213 | 5.082205  |
| 1  | 1.436212  | -1.620801 | 4.680198  |
| 1  | 2.557535  | -0.328577 | 6.367261  |
| 1  | 1.865611  | -0.218595 | 7.994279  |
| 1  | 2.170352  | -2.963260 | 11.367059 |

|   |           |           |           |
|---|-----------|-----------|-----------|
| 1 | 0.946557  | -3.064810 | 12.624727 |
| 1 | -0.377910 | -5.551379 | 13.219345 |
| 1 | 0.019159  | -7.005827 | 12.316784 |
| 1 | 1.992695  | -6.940127 | 10.241193 |
| 1 | 2.839793  | -5.461755 | 9.818438  |
| 1 | 2.883579  | -5.235258 | 14.764386 |
| 1 | 1.311341  | -4.452507 | 14.531084 |
| 1 | 3.423315  | -7.217867 | 13.537696 |
| 1 | 2.250083  | -7.899837 | 12.398531 |
| 1 | 4.156872  | -4.311086 | 11.496532 |
| 1 | 4.529991  | -5.147256 | 13.010547 |

The atomic coordinates (Å) of Cl<sub>2</sub>Pd(PTA)<sub>2</sub>; *trans*-**8**<sub>opt</sub>.

|    |           |           |           |
|----|-----------|-----------|-----------|
| 46 | 0.000000  | 0.000000  | 0.000000  |
| 15 | -0.805445 | 2.092065  | -0.583768 |
| 17 | 1.048818  | 0.826645  | 1.910117  |
| 7  | -1.026240 | 4.037587  | -2.491393 |
| 7  | -2.997510 | 3.645348  | -1.091147 |
| 7  | -1.037760 | 4.779164  | -0.157410 |
| 6  | 2.639018  | -2.295899 | 0.658560  |
| 6  | 0.398260  | -3.591896 | -0.409790 |
| 6  | 2.483868  | -3.936316 | 2.429323  |
| 6  | 0.582624  | -5.039309 | 1.522300  |
| 6  | 2.494877  | -4.658550 | 0.163675  |
| 6  | -2.639018 | 2.295899  | -0.658560 |
| 6  | -0.398260 | 3.591896  | 0.409790  |
| 6  | -2.483868 | 3.936316  | -2.429323 |
| 6  | -0.582624 | 5.039309  | -1.522300 |
| 6  | -2.494877 | 4.658550  | -0.163675 |
| 6  | -0.386129 | 2.744219  | -2.259460 |
| 15 | 0.805445  | -2.092065 | 0.583768  |
| 17 | -1.048818 | -0.826645 | -1.910117 |
| 7  | 1.026240  | -4.037587 | 2.491393  |
| 7  | 2.997510  | -3.645348 | 1.091147  |
| 7  | 1.037760  | -4.779164 | 0.157410  |
| 6  | 0.386129  | -2.744219 | 2.259460  |
| 1  | -0.697177 | -2.844901 | 2.342757  |
| 1  | 0.714518  | -2.021099 | 3.007234  |
| 1  | 3.044500  | -1.557742 | 1.352113  |
| 1  | 3.060945  | -2.096687 | -0.327906 |
| 1  | 0.697177  | 2.844901  | -2.342757 |
| 1  | -0.714518 | 2.021099  | -3.007234 |
| 1  | -3.044500 | 1.557742  | -1.352113 |
| 1  | -3.060945 | 2.096687  | 0.327906  |
| 1  | -0.731041 | 3.441159  | 1.437657  |
| 1  | 0.684527  | 3.723635  | 0.431209  |
| 1  | -2.901869 | 4.892157  | -2.750094 |
| 1  | -2.819782 | 3.161037  | -3.119283 |
| 1  | 0.506854  | 5.092794  | -1.534276 |

|   |           |           |           |
|---|-----------|-----------|-----------|
| 1 | -0.981555 | 6.007027  | -1.831655 |
| 1 | -2.911273 | 5.622885  | -0.460327 |
| 1 | -2.840957 | 4.426156  | 0.844330  |
| 1 | 2.911273  | -5.622885 | 0.460327  |
| 1 | 2.840957  | -4.426156 | -0.844330 |
| 1 | -0.506854 | -5.092794 | 1.534276  |
| 1 | 0.981555  | -6.007027 | 1.831655  |
| 1 | 2.901869  | -4.892157 | 2.750094  |
| 1 | 2.819782  | -3.161037 | 3.119283  |
| 1 | 0.731041  | -3.441159 | -1.437657 |
| 1 | -0.684527 | -3.723635 | -0.431209 |

The atomic coordinates (Å) of Cl<sub>2</sub>Pt(PTA)<sub>2</sub>; *cis*-**9**<sub>XRD</sub>.

|    |           |           |           |
|----|-----------|-----------|-----------|
| 78 | 1.070500  | 3.201800  | 9.828400  |
| 15 | 0.454600  | 1.631900  | 11.278300 |
| 15 | 1.968300  | 1.755800  | 8.390200  |
| 17 | 0.068600  | 4.826600  | 11.197400 |
| 17 | 1.710200  | 4.974100  | 8.388900  |
| 7  | 1.208200  | -0.249800 | 13.107300 |
| 7  | -0.858300 | -0.704500 | 11.818700 |
| 7  | -0.858700 | 0.998400  | 13.602300 |
| 7  | 3.285900  | -0.537900 | 7.666000  |
| 7  | 3.630200  | 1.427200  | 6.231000  |
| 7  | 1.483900  | 0.222100  | 6.173200  |
| 6  | 1.784900  | 0.732700  | 12.184700 |
| 6  | 2.482500  | 0.994600  | 5.433600  |
| 6  | -0.574400 | 0.212300  | 10.709300 |
| 6  | -0.570400 | 2.138700  | 12.722100 |
| 6  | 0.385200  | -1.240300 | 12.394600 |
| 6  | 0.367500  | 0.403600  | 14.112800 |
| 6  | 2.840400  | 0.205900  | 8.858300  |
| 6  | 3.227800  | 2.423500  | 7.226800  |
| 6  | 0.791800  | 1.071400  | 7.159400  |
| 6  | 4.227500  | 0.247200  | 6.862800  |
| 6  | -1.610700 | -0.026000 | 12.885800 |
| 6  | 2.148900  | -0.904500 | 6.835800  |
| 1  | -2.507789 | 0.420267  | 12.455586 |
| 1  | -1.915911 | -0.787031 | 13.606166 |
| 1  | 3.701896  | 0.453774  | 9.480694  |
| 1  | 2.183602  | -0.441267 | 9.440616  |
| 1  | 2.807605  | 3.293504  | 6.728697  |
| 1  | 4.096285  | 2.758787  | 7.796277  |
| 1  | 0.014645  | 0.493954  | 7.662845  |
| 1  | 0.300815  | 1.903845  | 6.652581  |
| 1  | 4.612856  | -0.400849 | 6.074164  |
| 1  | 5.059918  | 0.561016  | 7.493422  |
| 1  | 1.419039  | -1.448610 | 7.436335  |
| 1  | 2.511140  | -1.576807 | 6.055268  |
| 1  | 2.856988  | 0.365236  | 4.623955  |

|   |           |           |           |
|---|-----------|-----------|-----------|
| 1 | 2.001597  | 1.869502  | 4.994529  |
| 1 | 2.457515  | 0.233547  | 11.489855 |
| 1 | 2.375240  | 1.463630  | 12.739808 |
| 1 | -1.505758 | 0.601871  | 10.295124 |
| 1 | -0.066443 | -0.332889 | 9.912995  |
| 1 | -0.038119 | 2.911147  | 13.275251 |
| 1 | -1.499897 | 2.577792  | 12.360621 |
| 1 | 0.110865  | -2.017367 | 13.109316 |
| 1 | 0.979184  | -1.696344 | 11.601512 |
| 1 | 0.090387  | -0.351191 | 14.851355 |
| 1 | 0.954520  | 1.173054  | 14.616609 |

The atomic coordinates (Å) of Cl<sub>2</sub>Pt(PTA)<sub>2</sub>; *cis*-**9**<sub>opt</sub>.

|    |           |           |           |
|----|-----------|-----------|-----------|
| 78 | 0.684166  | 3.083503  | 9.615349  |
| 15 | 0.330561  | 1.606700  | 11.264075 |
| 15 | 1.816403  | 1.686199  | 8.267121  |
| 17 | -0.525301 | 4.750743  | 10.847078 |
| 17 | 0.949065  | 4.687313  | 7.835325  |
| 7  | 1.290898  | -0.104053 | 13.160895 |
| 7  | -0.801712 | -0.745963 | 12.059573 |
| 7  | -0.783962 | 1.063679  | 13.701225 |
| 7  | 3.107790  | -0.630944 | 7.608854  |
| 7  | 3.862689  | 1.396824  | 6.482464  |
| 7  | 1.717290  | 0.383440  | 5.871480  |
| 6  | 1.758511  | 0.829094  | 12.139995 |
| 6  | 2.891206  | 1.131858  | 5.421297  |
| 6  | -0.654272 | 0.093682  | 10.874015 |
| 6  | -0.620052 | 2.159353  | 12.750668 |
| 6  | 0.492392  | -1.184402 | 12.582312 |
| 6  | 0.501243  | 0.570678  | 14.189124 |
| 6  | 2.487932  | 0.030587  | 8.753217  |
| 6  | 3.348294  | 2.343545  | 7.467283  |
| 6  | 0.879764  | 1.181583  | 6.761655  |
| 6  | 4.246120  | 0.130434  | 7.098384  |
| 6  | -1.528313 | -0.051639 | 13.121827 |
| 6  | 2.158680  | -0.850317 | 6.518102  |
| 1  | -2.477834 | 0.313235  | 12.728500 |
| 1  | -1.733951 | -0.770897 | 13.916227 |
| 1  | 3.236779  | 0.165769  | 9.534653  |
| 1  | 1.694077  | -0.603189 | 9.148566  |
| 1  | 3.107402  | 3.292503  | 6.991692  |
| 1  | 4.098879  | 2.530135  | 8.237203  |
| 1  | 0.000082  | 0.610626  | 7.064220  |
| 1  | 0.537526  | 2.084411  | 6.254171  |
| 1  | 4.747893  | -0.478079 | 6.344334  |
| 1  | 4.946411  | 0.322158  | 7.912272  |
| 1  | 1.289233  | -1.388060 | 6.898442  |
| 1  | 2.649596  | -1.471570 | 5.767461  |
| 1  | 3.388984  | 0.544718  | 4.647888  |

|   |           |           |           |
|---|-----------|-----------|-----------|
| 1 | 2.567516  | 2.077956  | 4.986117  |
| 1 | 2.395331  | 0.301820  | 11.432375 |
| 1 | 2.358272  | 1.618428  | 12.596132 |
| 1 | -1.635102 | 0.405763  | 10.511285 |
| 1 | -0.181372 | -0.474771 | 10.073246 |
| 1 | -0.092991 | 2.990542  | 13.218718 |
| 1 | -1.593474 | 2.528289  | 12.428942 |
| 1 | 0.306054  | -1.921078 | 13.365175 |
| 1 | 1.060542  | -1.666049 | 11.785149 |
| 1 | 0.308621  | -0.144105 | 14.990871 |
| 1 | 1.076716  | 1.402915  | 14.596323 |

The atomic coordinates (Å) of Cl<sub>2</sub>Pt(PTA)<sub>2</sub>; *trans*-**9**<sub>XRD</sub>.

|    |           |           |           |
|----|-----------|-----------|-----------|
| 78 | 0.000000  | 0.000000  | 0.000000  |
| 15 | -0.809700 | 2.029400  | -0.565900 |
| 17 | 0.905300  | 0.798100  | 2.010400  |
| 7  | -1.005200 | 3.980900  | -2.505500 |
| 7  | -2.991700 | 3.613200  | -1.078500 |
| 7  | -1.010300 | 4.735400  | -0.147800 |
| 6  | 2.626200  | -2.251600 | 0.633200  |
| 6  | 0.390000  | -3.531000 | -0.415700 |
| 6  | 2.468300  | -3.893800 | 2.415200  |
| 6  | 0.556600  | -4.979700 | 1.512400  |
| 6  | 2.470700  | -4.619300 | 0.141200  |
| 6  | -2.626200 | 2.251600  | -0.633200 |
| 6  | -0.390000 | 3.531000  | 0.415700  |
| 6  | -2.468300 | 3.893800  | -2.415200 |
| 6  | -0.556600 | 4.979700  | -1.512400 |
| 6  | -2.470700 | 4.619300  | -0.141200 |
| 6  | -0.388800 | 2.670000  | -2.227400 |
| 15 | 0.809700  | -2.029400 | 0.565900  |
| 17 | -0.905300 | -0.798100 | -2.010400 |
| 7  | 1.005200  | -3.980900 | 2.505500  |
| 7  | 2.991700  | -3.613200 | 1.078500  |
| 7  | 1.010300  | -4.735400 | 0.147800  |
| 6  | 0.388800  | -2.670000 | 2.227400  |
| 1  | -0.696601 | -2.755487 | 2.307218  |
| 1  | 0.715577  | -1.944688 | 2.973748  |
| 1  | 3.046856  | -1.514859 | 1.320031  |
| 1  | 3.050525  | -2.064888 | -0.354528 |
| 1  | 0.696601  | 2.755487  | -2.307218 |
| 1  | -0.715577 | 1.944688  | -2.973748 |
| 1  | -3.046856 | 1.514859  | -1.320031 |
| 1  | -3.050525 | 2.064888  | 0.354528  |
| 1  | -0.721572 | 3.389960  | 1.445295  |
| 1  | 0.694893  | 3.647540  | 0.437435  |
| 1  | -2.877252 | 4.853135  | -2.738198 |
| 1  | -2.819357 | 3.121342  | -3.101430 |
| 1  | 0.533429  | 5.021179  | -1.524063 |

|   |           |           |           |
|---|-----------|-----------|-----------|
| 1 | -0.943439 | 5.950700  | -1.827345 |
| 1 | -2.886290 | 5.587433  | -0.427368 |
| 1 | -2.808571 | 4.378910  | 0.867092  |
| 1 | 2.886290  | -5.587433 | 0.427368  |
| 1 | 2.808571  | -4.378910 | -0.867092 |
| 1 | -0.533429 | -5.021179 | 1.524063  |
| 1 | 0.943439  | -5.950700 | 1.827345  |
| 1 | 2.877252  | -4.853135 | 2.738198  |
| 1 | 2.819357  | -3.121342 | 3.101430  |
| 1 | 0.721572  | -3.389960 | -1.445295 |
| 1 | -0.694893 | -3.647540 | -0.437435 |

The atomic coordinates (Å) of Cl<sub>2</sub>Pt(PTA)<sub>2</sub>; *trans*-**9**<sub>opt</sub>.

|    |           |           |           |
|----|-----------|-----------|-----------|
| 78 | 0.000000  | 0.000000  | 0.000000  |
| 15 | -0.804599 | 2.087559  | -0.589747 |
| 17 | 1.029524  | 0.837754  | 1.926806  |
| 7  | -1.026465 | 4.035075  | -2.491997 |
| 7  | -2.996358 | 3.641366  | -1.089768 |
| 7  | -1.033733 | 4.770853  | -0.155891 |
| 6  | 2.637094  | -2.291091 | 0.661006  |
| 6  | 0.394141  | -3.581971 | -0.407774 |
| 6  | 2.484088  | -3.935122 | 2.427952  |
| 6  | 0.580496  | -5.033778 | 1.521038  |
| 6  | 2.491081  | -4.651540 | 0.160384  |
| 6  | -2.637094 | 2.291091  | -0.661006 |
| 6  | -0.394141 | 3.581971  | 0.407774  |
| 6  | -2.484088 | 3.935122  | -2.427952 |
| 6  | -0.580496 | 5.033778  | -1.521038 |
| 6  | -2.491081 | 4.651540  | -0.160384 |
| 6  | -0.386905 | 2.740746  | -2.263905 |
| 15 | 0.804599  | -2.087559 | 0.589747  |
| 17 | -1.029524 | -0.837754 | -1.926806 |
| 7  | 1.026465  | -4.035075 | 2.491997  |
| 7  | 2.996358  | -3.641366 | 1.089768  |
| 7  | 1.033733  | -4.770853 | 0.155891  |
| 6  | 0.386905  | -2.740746 | 2.263905  |
| 1  | -0.696477 | -2.839902 | 2.348050  |
| 1  | 0.716612  | -2.018978 | 3.012540  |
| 1  | 3.043929  | -1.553893 | 1.355045  |
| 1  | 3.056241  | -2.088714 | -0.326047 |
| 1  | 0.696477  | 2.839902  | -2.348050 |
| 1  | -0.716612 | 2.018978  | -3.012540 |
| 1  | -3.043929 | 1.553893  | -1.355045 |
| 1  | -3.056241 | 2.088714  | 0.326047  |
| 1  | -0.725920 | 3.428319  | 1.435543  |
| 1  | 0.688810  | 3.712715  | 0.428529  |
| 1  | -2.901568 | 4.892180  | -2.745689 |
| 1  | -2.821853 | 3.161811  | -3.119213 |
| 1  | 0.509017  | 5.086251  | -1.534362 |

|   |           |           |           |
|---|-----------|-----------|-----------|
| 1 | -0.979028 | 6.002691  | -1.827096 |
| 1 | -2.906871 | 5.617124  | -0.453727 |
| 1 | -2.835743 | 4.416657  | 0.847549  |
| 1 | 2.906871  | -5.617124 | 0.453727  |
| 1 | 2.835743  | -4.416657 | -0.847549 |
| 1 | -0.509017 | -5.086251 | 1.534362  |
| 1 | 0.979028  | -6.002691 | 1.827096  |
| 1 | 2.901568  | -4.892180 | 2.745689  |
| 1 | 2.821853  | -3.161811 | 3.119213  |
| 1 | 0.725920  | -3.428319 | -1.435543 |
| 1 | -0.688810 | -3.712715 | -0.428529 |

The atomic coordinates (Å) of Cu<sup>+</sup>(PTA)<sub>4</sub>; **10**<sub>opt</sub><sup>+</sup>.

|    |           |           |           |
|----|-----------|-----------|-----------|
| 29 | -0.029244 | 0.009391  | -0.002901 |
| 15 | 0.763730  | 0.014062  | 2.149195  |
| 6  | 0.871134  | 1.611648  | 3.081925  |
| 6  | -0.090976 | -0.971226 | 3.467469  |
| 6  | 2.485008  | -0.579509 | 2.496884  |
| 7  | 1.405798  | 1.434044  | 4.430831  |
| 7  | 0.559306  | -0.839893 | 4.770020  |
| 7  | 2.828191  | -0.493331 | 3.915199  |
| 6  | 2.760670  | 0.884193  | 4.400317  |
| 6  | 0.559772  | 0.548611  | 5.229312  |
| 6  | 1.939490  | -1.319900 | 4.730755  |
| 1  | 1.506898  | 2.303541  | 2.525251  |
| 1  | -0.125702 | 2.054978  | 3.135069  |
| 1  | -1.128056 | -0.638699 | 3.543599  |
| 1  | -0.107792 | -2.021413 | 3.168546  |
| 1  | 2.575066  | -1.615138 | 2.162316  |
| 1  | 3.189494  | 0.014750  | 1.911155  |
| 1  | 3.155338  | 0.902749  | 5.418092  |
| 1  | 3.390303  | 1.516516  | 3.772262  |
| 1  | 0.929766  | 0.563950  | 6.256323  |
| 1  | -0.463321 | 0.928162  | 5.223167  |
| 1  | 2.324917  | -1.323373 | 5.752231  |
| 1  | 1.952735  | -2.342910 | 4.351284  |
| 15 | -2.296182 | 0.360135  | -0.005066 |
| 6  | -2.979388 | 2.017257  | -0.478493 |
| 6  | -3.390206 | -0.662795 | -1.098657 |
| 6  | -3.268288 | 0.147834  | 1.559638  |
| 7  | -4.439423 | 2.056208  | -0.423556 |
| 7  | -4.801039 | -0.303859 | -0.969726 |
| 7  | -4.693848 | 0.408969  | 1.371392  |
| 6  | -4.931665 | 1.780942  | 0.925648  |
| 6  | -5.035756 | 1.089922  | -1.344529 |
| 6  | -5.282009 | -0.507968 | 0.395760  |
| 1  | -2.567361 | 2.772000  | 0.195010  |
| 1  | -2.644481 | 2.260429  | -1.489643 |
| 1  | -3.071751 | -0.533147 | -2.135507 |

|    |           |           |           |
|----|-----------|-----------|-----------|
| 1  | -3.257967 | -1.716776 | -0.843043 |
| 1  | -3.127039 | -0.871619 | 1.925718  |
| 1  | -2.870114 | 0.828163  | 2.316269  |
| 1  | -6.009169 | 1.956315  | 0.933619  |
| 1  | -4.462445 | 2.472887  | 1.626823  |
| 1  | -6.114340 | 1.258187  | -1.358352 |
| 1  | -4.644972 | 1.262470  | -2.348504 |
| 1  | -6.363013 | -0.355485 | 0.398914  |
| 1  | -5.075760 | -1.535615 | 0.699024  |
| 15 | 0.446429  | -2.017661 | -0.965609 |
| 6  | 2.197521  | -2.445769 | -1.399268 |
| 6  | 0.040533  | -3.576605 | -0.049832 |
| 6  | -0.316542 | -2.492676 | -2.587356 |
| 7  | 2.315362  | -3.780837 | -1.983369 |
| 7  | 0.416019  | -4.775584 | -0.796937 |
| 7  | 0.101836  | -3.821174 | -3.031213 |
| 6  | 1.549370  | -3.890579 | -3.224046 |
| 6  | 1.854651  | -4.814172 | -1.057237 |
| 6  | -0.292176 | -4.853753 | -2.073574 |
| 1  | 2.576915  | -1.703608 | -2.105201 |
| 1  | 2.812381  | -2.383125 | -0.498986 |
| 1  | 0.558993  | -3.566797 | 0.911293  |
| 1  | -1.031317 | -3.592736 | 0.158902  |
| 1  | -1.403554 | -2.467071 | -2.487466 |
| 1  | -0.041740 | -1.750143 | -3.339341 |
| 1  | 1.783033  | -4.854354 | -3.680712 |
| 1  | 1.858820  | -3.098558 | -3.907853 |
| 1  | 2.092631  | -5.786914 | -1.492093 |
| 1  | 2.392872  | -4.715161 | -0.113205 |
| 1  | -0.077435 | -5.826763 | -2.519730 |
| 1  | -1.366049 | -4.784151 | -1.892835 |
| 15 | 1.029461  | 1.664142  | -1.186520 |
| 6  | 0.618894  | 3.447354  | -0.888557 |
| 6  | 2.872803  | 1.827989  | -1.079520 |
| 6  | 0.897125  | 1.698264  | -3.034469 |
| 7  | 1.399251  | 4.347116  | -1.735920 |
| 7  | 3.383510  | 2.920648  | -1.905525 |

|   |           |          |           |
|---|-----------|----------|-----------|
| 7 | 1.642811  | 2.807822 | -3.626225 |
| 6 | 1.145270  | 4.099093 | -3.154589 |
| 6 | 2.833086  | 4.209007 | -1.486546 |
| 6 | 3.069721  | 2.715993 | -3.318714 |
| 1 | -0.445513 | 3.601826 | -1.077003 |
| 1 | 0.800187  | 3.682029 | 0.162375  |
| 1 | 3.153019  | 1.996943 | -0.037513 |
| 1 | 3.329874  | 0.886415 | -1.391205 |
| 1 | 1.273163  | 0.753170 | -3.431780 |
| 1 | -0.156999 | 1.772457 | -3.310764 |
| 1 | 1.643695  | 4.882860 | -3.728331 |
| 1 | 0.072118  | 4.160425 | -3.342462 |
| 1 | 3.349251  | 4.993513 | -2.043392 |
| 1 | 3.027599  | 4.353090 | -0.422561 |
| 1 | 3.589082  | 3.484844 | -3.894101 |
| 1 | 3.441605  | 1.738544 | -3.630274 |

The atomic coordinates (Å) of [LCS<sub>2</sub>]Cu(PTA); **11**<sub>opt</sub>.

|    |           |           |           |
|----|-----------|-----------|-----------|
| 15 | 2.296397  | -0.011181 | 0.203220  |
| 7  | 4.718474  | 1.084145  | 0.974809  |
| 7  | 4.596865  | 0.235279  | -1.319272 |
| 7  | 4.703204  | -1.329391 | 0.562651  |
| 6  | 3.278215  | 1.226248  | 1.177175  |
| 1  | 2.965734  | 2.233149  | 0.890999  |
| 1  | 3.041157  | 1.104974  | 2.236153  |
| 6  | 3.139813  | 0.263629  | -1.427572 |
| 1  | 2.810013  | -0.503396 | -2.132327 |
| 1  | 2.821292  | 1.227425  | -1.831431 |
| 6  | 3.260987  | -1.513533 | 0.709695  |
| 1  | 3.023655  | -1.746863 | 1.749720  |
| 1  | 2.937207  | -2.364116 | 0.106120  |
| 6  | 5.085490  | 1.283407  | -0.425155 |
| 1  | 4.704198  | 2.248938  | -0.762322 |
| 1  | 6.175449  | 1.301220  | -0.489880 |
| 6  | 5.069947  | -1.056549 | -0.825182 |
| 1  | 4.676320  | -1.850036 | -1.462993 |
| 1  | 6.159688  | -1.066073 | -0.894643 |
| 6  | 5.190086  | -0.232969 | 1.397636  |
| 1  | 6.281076  | -0.232123 | 1.351740  |
| 1  | 4.887670  | -0.407699 | 2.431383  |
| 29 | 0.105818  | -0.008419 | 0.323693  |
| 16 | -1.192470 | -0.044619 | 2.307206  |
| 16 | -4.161475 | 0.021728  | 2.555818  |
| 7  | -1.128844 | 1.474926  | -0.549212 |
| 7  | -2.449754 | 1.208915  | -0.493049 |
| 7  | -1.140096 | -1.426323 | -0.633581 |
| 7  | -2.460689 | -1.187978 | -0.506613 |
| 6  | -1.013023 | 2.653625  | -1.133455 |
| 6  | -2.285353 | 3.160813  | -1.451528 |
| 6  | -3.185468 | 2.214283  | -1.026841 |
| 6  | 0.324482  | 3.256757  | -1.387865 |
| 6  | -4.671658 | 2.196871  | -1.085320 |
| 6  | -1.032010 | -2.610418 | -1.209893 |
| 6  | -2.308690 | -3.146889 | -1.451229 |

|   |           |           |           |
|---|-----------|-----------|-----------|
| 6 | -3.203910 | -2.213927 | -0.985840 |
| 6 | 0.302783  | -3.206145 | -1.494413 |
| 6 | -4.691161 | -2.224726 | -0.959662 |
| 6 | -2.953282 | 0.009644  | 0.139645  |
| 6 | -2.751993 | -0.003086 | 1.674535  |
| 1 | -2.518215 | 4.099649  | -1.924827 |
| 1 | 0.642950  | 3.078317  | -2.416983 |
| 1 | 0.300572  | 4.334126  | -1.227040 |
| 1 | 1.065878  | 2.820873  | -0.718827 |
| 1 | -5.108218 | 2.087107  | -0.090808 |
| 1 | -5.026471 | 3.131329  | -1.514389 |
| 1 | -5.036884 | 1.378387  | -1.709570 |
| 1 | -2.547699 | -4.092552 | -1.907567 |
| 1 | 0.620901  | -3.852147 | -0.673647 |
| 1 | 0.274735  | -3.806456 | -2.403050 |
| 1 | 1.048108  | -2.420192 | -1.616120 |
| 1 | -5.109202 | -1.414911 | -1.561676 |
| 1 | -5.052660 | -3.167037 | -1.365279 |
| 1 | -5.070173 | -2.118734 | 0.058692  |
| 1 | -4.024297 | 0.015746  | -0.023728 |

The atomic coordinates (Å) of ClAu(PTA); **12**<sub>XRD</sub>.

|    |           |           |          |
|----|-----------|-----------|----------|
| 79 | 0.835400  | 0.751800  | 1.643000 |
| 15 | 2.327800  | -0.609900 | 2.578900 |
| 17 | -0.596300 | 2.190200  | 0.552300 |
| 7  | 4.264400  | -0.955200 | 4.478400 |
| 7  | 4.609800  | -2.081600 | 2.286900 |
| 7  | 2.928400  | -2.936600 | 3.901400 |
| 6  | 3.311200  | 0.048700  | 3.998000 |
| 6  | 3.701000  | -1.228100 | 1.525000 |
| 6  | 1.793200  | -2.176300 | 3.329100 |
| 6  | 3.593500  | -2.193000 | 4.927100 |
| 6  | 5.204700  | -1.343700 | 3.389100 |
| 6  | 3.916000  | -3.284700 | 2.814500 |
| 1  | 3.843821  | 0.947166  | 3.682912 |
| 1  | 2.626008  | 0.329630  | 4.799655 |
| 1  | 3.281772  | -1.781677 | 0.683155 |
| 1  | 4.246653  | -0.375510 | 1.117941 |
| 1  | 1.287599  | -2.786554 | 2.579964 |
| 1  | 1.068634  | -1.962384 | 4.117475 |
| 1  | 4.360385  | -2.828118 | 5.374659 |
| 1  | 2.874924  | -1.931265 | 5.707160 |
| 1  | 5.975638  | -1.969894 | 3.841193 |
| 1  | 5.679031  | -0.441096 | 2.999725 |
| 1  | 4.663165  | -3.949348 | 3.246391 |
| 1  | 3.392997  | -3.790910 | 2.005502 |

The atomic coordinates (Å) of ClAu(PTA); **12**<sub>opt.</sub>

|    |           |           |          |
|----|-----------|-----------|----------|
| 79 | 0.818512  | 0.765340  | 1.625343 |
| 15 | 2.349430  | -0.589156 | 2.565192 |
| 17 | -0.765064 | 2.164957  | 0.652420 |
| 7  | 4.276549  | -0.974458 | 4.456903 |
| 7  | 4.613086  | -2.088570 | 2.302309 |
| 7  | 2.917481  | -2.921902 | 3.860024 |
| 6  | 3.342623  | 0.045214  | 3.986136 |
| 6  | 3.727929  | -1.230912 | 1.518568 |
| 6  | 1.786285  | -2.184966 | 3.302578 |
| 6  | 3.579271  | -2.171279 | 4.926932 |
| 6  | 5.226059  | -1.361519 | 3.413735 |
| 6  | 3.906147  | -3.253341 | 2.834360 |
| 1  | 3.887503  | 0.936563  | 3.671342 |
| 1  | 2.666515  | 0.335816  | 4.791793 |
| 1  | 3.308913  | -1.790103 | 0.680539 |
| 1  | 4.287165  | -0.388008 | 1.109719 |
| 1  | 1.293658  | -2.779981 | 2.532079 |
| 1  | 1.052274  | -1.977626 | 4.082752 |
| 1  | 4.314467  | -2.828229 | 5.394750 |
| 1  | 2.841332  | -1.886364 | 5.677888 |
| 1  | 5.977797  | -2.010120 | 3.866512 |
| 1  | 5.722871  | -0.469629 | 3.029660 |
| 1  | 4.645332  | -3.919925 | 3.281774 |
| 1  | 3.413590  | -3.780160 | 2.016123 |

The atomic coordinates (Å) of IAU(PTA); **14**<sub>opt.</sub>

|    |           |           |          |
|----|-----------|-----------|----------|
| 79 | 0.811224  | 0.772380  | 1.620838 |
| 15 | 2.357474  | -0.597235 | 2.570417 |
| 53 | -0.963782 | 2.345319  | 0.529993 |
| 7  | 4.285508  | -0.982507 | 4.462791 |
| 7  | 4.622629  | -2.096648 | 2.308530 |
| 7  | 2.927237  | -2.930646 | 3.866006 |
| 6  | 3.351041  | 0.036440  | 3.992139 |
| 6  | 3.737501  | -1.239299 | 1.524709 |
| 6  | 1.796105  | -2.194465 | 3.307852 |
| 6  | 3.588812  | -2.179719 | 4.932709 |
| 6  | 5.235264  | -1.369234 | 3.419754 |
| 6  | 3.915933  | -3.261694 | 2.840274 |
| 1  | 3.895399  | 0.927876  | 3.677039 |
| 1  | 2.674865  | 0.326523  | 4.797877 |
| 1  | 3.318716  | -1.798894 | 0.686965 |
| 1  | 4.296726  | -0.396278 | 1.116050 |
| 1  | 1.305239  | -2.789633 | 2.536323 |
| 1  | 1.061235  | -1.988093 | 4.087417 |
| 1  | 4.324720  | -2.836243 | 5.399944 |
| 1  | 2.850971  | -1.895351 | 5.683970 |
| 1  | 5.987606  | -2.017079 | 3.872685 |
| 1  | 5.731512  | -0.477028 | 3.035681 |
| 1  | 4.654861  | -3.928692 | 3.287470 |
| 1  | 3.422927  | -3.788157 | 2.021997 |

The atomic coordinates (Å) of Au<sup>+</sup>(PTA).

|    |          |           |          |
|----|----------|-----------|----------|
| 79 | 0.811026 | 0.717501  | 1.685459 |
| 15 | 2.341622 | -0.610706 | 2.593366 |
| 7  | 4.274010 | -0.970425 | 4.451926 |
| 7  | 4.595834 | -2.075838 | 2.292797 |
| 7  | 2.924923 | -2.925696 | 3.865218 |
| 6  | 3.331679 | 0.048383  | 4.001468 |
| 6  | 3.702639 | -1.225559 | 1.513003 |
| 6  | 1.776779 | -2.205343 | 3.324897 |
| 6  | 3.590890 | -2.173150 | 4.928586 |
| 6  | 5.216866 | -1.345602 | 3.398053 |
| 6  | 3.904206 | -3.248948 | 2.827495 |
| 1  | 3.864420 | 0.943009  | 3.677496 |
| 1  | 2.659147 | 0.330342  | 4.812302 |
| 1  | 3.274791 | -1.784971 | 0.680430 |
| 1  | 4.248499 | -0.374881 | 1.103717 |
| 1  | 1.283401 | -2.798546 | 2.554154 |
| 1  | 1.049928 | -2.001799 | 4.111984 |
| 1  | 4.336477 | -2.824803 | 5.386012 |
| 1  | 2.859189 | -1.896134 | 5.688074 |
| 1  | 5.978644 | -1.988616 | 3.840782 |
| 1  | 5.701376 | -0.448624 | 3.011121 |
| 1  | 4.652656 | -3.910758 | 3.265251 |
| 1  | 3.407024 | -3.777396 | 2.013542 |

The atomic coordinates (Å) of F<sub>5</sub>C<sub>6</sub>Au(PTA); **15**<sub>XRD</sub>.

|    |           |           |           |
|----|-----------|-----------|-----------|
| 79 | 8.209100  | 5.607900  | 12.796600 |
| 9  | 11.333900 | 5.538500  | 13.910200 |
| 9  | 12.835900 | 7.464100  | 15.029900 |
| 9  | 11.851800 | 9.985100  | 15.311700 |
| 9  | 9.306100  | 10.549400 | 14.485900 |
| 9  | 7.833400  | 8.658000  | 13.296800 |
| 6  | 9.533300  | 7.030500  | 13.525900 |
| 6  | 10.793100 | 6.793600  | 13.987000 |
| 6  | 11.593900 | 7.754000  | 14.591400 |
| 6  | 11.090400 | 9.020600  | 14.743600 |
| 6  | 9.823600  | 9.306400  | 14.326100 |
| 6  | 9.075400  | 8.310900  | 13.717300 |
| 15 | 6.495000  | 4.206900  | 12.290200 |
| 7  | 4.654200  | 2.366600  | 13.132500 |
| 7  | 5.308300  | 2.255600  | 10.761900 |
| 7  | 3.842600  | 4.083200  | 11.554600 |
| 6  | 5.827800  | 3.105700  | 13.610300 |
| 6  | 6.577400  | 2.983200  | 10.909600 |
| 6  | 4.930100  | 5.055800  | 11.824400 |
| 6  | 4.972600  | 1.523900  | 11.979600 |
| 6  | 4.187700  | 3.173500  | 10.453000 |
| 6  | 3.554900  | 3.275500  | 12.752700 |
| 1  | 6.604029  | 2.404566  | 13.921089 |
| 1  | 5.559071  | 3.710530  | 14.477428 |
| 1  | 6.812797  | 3.508709  | 9.982880  |
| 1  | 7.385096  | 2.276462  | 11.105406 |
| 1  | 4.628629  | 5.723285  | 12.632662 |
| 1  | 5.102855  | 5.664345  | 10.935793 |
| 1  | 5.803300  | 0.865317  | 12.240941 |
| 1  | 4.099146  | 0.904309  | 11.768863 |
| 1  | 4.441688  | 3.759529  | 9.569011  |
| 1  | 3.310634  | 2.564383  | 10.231044 |
| 1  | 2.674060  | 2.666346  | 12.545305 |
| 1  | 3.333048  | 3.939484  | 13.588811 |

The atomic coordinates (Å) of F<sub>5</sub>C<sub>6</sub>Au(PTA); **15**<sub>opt.</sub>

|    |           |           |           |
|----|-----------|-----------|-----------|
| 79 | 7.894469  | 5.837396  | 13.118523 |
| 9  | 10.956955 | 5.448489  | 14.052610 |
| 9  | 12.840115 | 7.168040  | 14.846918 |
| 9  | 12.307562 | 9.824482  | 14.967901 |
| 9  | 9.851019  | 10.743586 | 14.279330 |
| 9  | 7.949006  | 9.046028  | 13.481407 |
| 6  | 9.365214  | 7.168107  | 13.730214 |
| 6  | 10.634291 | 6.753486  | 14.092223 |
| 6  | 11.632171 | 7.618385  | 14.508015 |
| 6  | 11.365810 | 8.974152  | 14.571544 |
| 6  | 10.111144 | 9.437641  | 14.219175 |
| 6  | 9.147455  | 8.531807  | 13.809875 |
| 15 | 6.271545  | 4.355196  | 12.452302 |
| 7  | 4.633207  | 2.250672  | 13.067768 |
| 7  | 5.478362  | 2.345344  | 10.771777 |
| 7  | 3.743254  | 3.910548  | 11.503078 |
| 6  | 5.655106  | 3.104404  | 13.666181 |
| 6  | 6.621312  | 3.212775  | 11.041247 |
| 6  | 4.637974  | 5.002025  | 11.877279 |
| 6  | 5.155308  | 1.504782  | 11.923800 |
| 6  | 4.291203  | 3.115993  | 10.404775 |
| 6  | 3.470700  | 3.023605  | 12.633057 |
| 1  | 6.495181  | 2.497927  | 14.009089 |
| 1  | 5.247012  | 3.623122  | 14.535417 |
| 1  | 6.858610  | 3.804132  | 10.155089 |
| 1  | 7.499573  | 2.610446  | 11.280058 |
| 1  | 4.189267  | 5.596828  | 12.674848 |
| 1  | 4.797638  | 5.662977  | 11.023691 |
| 1  | 6.046525  | 0.954467  | 12.229176 |
| 1  | 4.394475  | 0.786037  | 11.614330 |
| 1  | 4.533684  | 3.775301  | 9.570002  |
| 1  | 3.521095  | 2.414579  | 10.078880 |
| 1  | 2.692784  | 2.320734  | 12.329571 |
| 1  | 3.095828  | 3.612669  | 13.471283 |

The atomic coordinates (Å) of H<sub>5</sub>C<sub>6</sub>SAu(PTA); **16**<sub>XRD</sub>.

|    |          |           |           |
|----|----------|-----------|-----------|
| 79 | 5.217700 | 2.865600  | 16.106300 |
| 16 | 6.596500 | 1.537700  | 17.392500 |
| 15 | 3.960200 | 4.033400  | 14.652600 |
| 7  | 3.084300 | 6.409100  | 13.579300 |
| 7  | 1.527000 | 4.507600  | 13.568300 |
| 7  | 3.420700 | 4.531900  | 12.005600 |
| 6  | 3.945600 | 5.898600  | 14.623500 |
| 6  | 4.316000 | 3.747200  | 12.862500 |
| 6  | 2.133400 | 3.755700  | 14.647200 |
| 6  | 1.694900 | 5.975000  | 13.748500 |
| 6  | 2.046300 | 4.177800  | 12.242100 |
| 6  | 3.559500 | 5.962800  | 12.227500 |
| 6  | 5.485900 | 0.340800  | 18.089300 |
| 6  | 4.177200 | 0.650000  | 18.433100 |
| 6  | 3.352500 | -0.288600 | 19.006200 |
| 6  | 3.823900 | -1.592300 | 19.240900 |
| 6  | 5.150900 | -1.894200 | 18.902500 |
| 6  | 5.954100 | -0.959200 | 18.327600 |
| 1  | 4.967347 | 6.253713  | 14.477420 |
| 1  | 3.610883 | 6.257109  | 15.599305 |
| 1  | 4.202317 | 2.685129  | 12.638477 |
| 1  | 5.354608 | 4.017085  | 12.664583 |
| 1  | 1.716347 | 4.064373  | 15.607141 |
| 1  | 1.933775 | 2.689068  | 14.524680 |
| 1  | 1.082180 | 6.476943  | 12.999605 |
| 1  | 1.344239 | 6.257822  | 14.741945 |
| 1  | 1.425773 | 4.699733  | 11.511032 |
| 1  | 1.921241 | 3.104427  | 12.077709 |
| 1  | 4.603164 | 6.257438  | 12.115809 |
| 1  | 2.962118 | 6.487802  | 11.481645 |
| 1  | 3.807027 | 1.654997  | 18.271514 |
| 1  | 2.335307 | -0.026352 | 19.270317 |
| 1  | 3.183395 | -2.339747 | 19.689589 |
| 1  | 5.532035 | -2.892246 | 19.084776 |
| 1  | 6.972928 | -1.207049 | 18.055352 |

The atomic coordinates (Å) of H<sub>5</sub>C<sub>6</sub>SAu(PTA); 16<sub>opt.</sub>

|    |          |           |           |
|----|----------|-----------|-----------|
| 79 | 5.191316 | 2.720454  | 15.934450 |
| 16 | 6.509502 | 1.456936  | 17.381195 |
| 15 | 3.958586 | 3.977350  | 14.485863 |
| 7  | 3.151807 | 6.437831  | 13.605139 |
| 7  | 1.487981 | 4.643498  | 13.519805 |
| 7  | 3.337262 | 4.675725  | 11.915411 |
| 6  | 4.025378 | 5.820971  | 14.599159 |
| 6  | 4.237128 | 3.805373  | 12.666844 |
| 6  | 2.121994 | 3.769326  | 14.501802 |
| 6  | 1.754794 | 6.053451  | 13.800630 |
| 6  | 1.934980 | 4.342568  | 12.160374 |
| 6  | 3.549664 | 6.084721  | 12.243106 |
| 6  | 5.452991 | 0.258791  | 18.150427 |
| 6  | 4.081490 | 0.436358  | 18.339611 |
| 6  | 3.321682 | -0.533813 | 18.974482 |
| 6  | 3.912469 | -1.697582 | 19.445105 |
| 6  | 5.276737 | -1.879235 | 19.270164 |
| 6  | 6.038280 | -0.915295 | 18.628009 |
| 1  | 5.054929 | 6.150411  | 14.448495 |
| 1  | 3.725121 | 6.126728  | 15.602921 |
| 1  | 4.078158 | 2.764697  | 12.379078 |
| 1  | 5.275139 | 4.054749  | 12.440285 |
| 1  | 1.746995 | 3.995572  | 15.501585 |
| 1  | 1.879995 | 2.726960  | 14.287009 |
| 1  | 1.142352 | 6.653505  | 13.125351 |
| 1  | 1.459478 | 6.278370  | 14.826440 |
| 1  | 1.324121 | 4.924808  | 11.468306 |
| 1  | 1.775386 | 3.283035  | 11.955046 |
| 1  | 4.602123 | 6.333313  | 12.099464 |
| 1  | 2.955360 | 6.684828  | 11.551820 |
| 1  | 3.606118 | 1.344644  | 17.990530 |
| 1  | 2.258341 | -0.373421 | 19.105698 |
| 1  | 3.317343 | -2.452586 | 19.942554 |
| 1  | 5.755458 | -2.781447 | 19.631109 |
| 1  | 7.100823 | -1.072444 | 18.489136 |

The atomic coordinates (Å) of [(py<sup>b</sup>-H)ClAu]<sup>+</sup>(PTA); 17<sub>XRD</sub>.

|    |          |           |           |
|----|----------|-----------|-----------|
| 6  | 4.955200 | 12.345200 | 4.922500  |
| 6  | 4.901700 | 13.483600 | 4.133800  |
| 6  | 5.844000 | 14.499500 | 4.322700  |
| 6  | 6.819500 | 14.361500 | 5.289900  |
| 6  | 6.855900 | 13.229300 | 6.088500  |
| 6  | 5.926500 | 12.203200 | 5.918400  |
| 6  | 5.916500 | 11.005100 | 6.844000  |
| 6  | 4.628200 | 10.968800 | 7.620000  |
| 6  | 4.563100 | 11.038800 | 8.999100  |
| 6  | 3.341400 | 11.058300 | 9.635500  |
| 6  | 2.185000 | 10.985600 | 8.893300  |
| 6  | 2.286300 | 10.908400 | 7.526800  |
| 6  | 3.442100 | 9.059100  | 1.847500  |
| 6  | 2.636200 | 11.736600 | 1.480700  |
| 6  | 5.398200 | 11.122400 | 1.763900  |
| 6  | 4.986800 | 9.479700  | 0.017800  |
| 6  | 2.660800 | 9.987300  | -0.242000 |
| 6  | 4.294100 | 11.738800 | -0.311900 |
| 7  | 3.474500 | 10.911600 | 6.902600  |
| 7  | 3.621800 | 9.076900  | 0.389300  |
| 7  | 5.302900 | 10.881200 | 0.318200  |
| 7  | 2.905400 | 11.417000 | 0.059800  |
| 15 | 3.770100 | 10.737500 | 2.533200  |
| 17 | 1.955900 | 9.127100  | 4.770000  |
| 79 | 3.571600 | 10.848700 | 4.805900  |
| 1  | 4.382031 | 11.620369 | -1.392173 |
| 1  | 4.499118 | 12.779546 | -0.059718 |
| 1  | 1.651706 | 9.723771  | 0.073443  |
| 1  | 2.734548 | 9.865177  | -1.322744 |
| 1  | 5.700454 | 8.832309  | 0.526958  |
| 1  | 5.094270 | 9.337309  | -1.057994 |
| 1  | 4.125807 | 8.345005  | 2.307877  |
| 1  | 2.425458 | 8.769100  | 2.103754  |
| 1  | 5.666840 | 12.159633 | 1.958749  |
| 1  | 6.162416 | 10.484416 | 2.208807  |
| 1  | 1.604850 | 11.489940 | 1.733766  |

|   |          |           |           |
|---|----------|-----------|-----------|
| 1 | 2.788071 | 12.801303 | 1.654843  |
| 1 | 5.799329 | 15.389390 | 3.708313  |
| 1 | 4.131373 | 13.615310 | 3.385507  |
| 1 | 7.553241 | 15.143739 | 5.436219  |
| 1 | 7.612284 | 13.135204 | 6.858576  |
| 1 | 6.020918 | 10.077069 | 6.276089  |
| 1 | 6.751883 | 11.056431 | 7.538209  |
| 1 | 3.296969 | 11.125315 | 10.714568 |
| 1 | 5.483162 | 11.085110 | 9.564905  |
| 1 | 1.209130 | 10.993309 | 9.356134  |
| 1 | 1.412119 | 10.843385 | 6.895739  |

The atomic coordinates (Å) of [(py<sup>b</sup>-H)ClAu]<sup>+</sup>(PTA); **17**<sub>opt</sub>.

|    |           |           |           |
|----|-----------|-----------|-----------|
| 6  | 9.874991  | 12.756961 | 1.776484  |
| 6  | 9.965531  | 13.912691 | 2.535908  |
| 6  | 9.013956  | 14.912635 | 2.384214  |
| 6  | 7.980889  | 14.751404 | 1.475947  |
| 6  | 7.917606  | 13.607116 | 0.695724  |
| 6  | 8.867800  | 12.601265 | 0.829898  |
| 6  | 8.867618  | 11.410593 | -0.097777 |
| 6  | 10.130730 | 11.383212 | -0.917876 |
| 6  | 10.106250 | 11.387724 | -2.301607 |
| 6  | 11.294804 | 11.399400 | -3.008947 |
| 6  | 12.494365 | 11.404088 | -2.317391 |
| 6  | 12.459919 | 11.386521 | -0.941367 |
| 6  | 10.862105 | 9.268520  | 4.644573  |
| 6  | 12.393667 | 11.588280 | 5.193550  |
| 6  | 9.568542  | 11.753084 | 5.003887  |
| 6  | 11.953629 | 9.776893  | 6.743326  |
| 6  | 10.861922 | 11.873552 | 7.048021  |
| 6  | 9.579627  | 9.917838  | 6.589433  |
| 7  | 11.304544 | 11.378255 | -0.267258 |
| 7  | 10.765481 | 9.218898  | 6.096698  |
| 7  | 12.083503 | 11.224411 | 6.570993  |
| 7  | 9.647452  | 11.367269 | 6.407742  |
| 15 | 11.011938 | 11.028190 | 4.117085  |
| 17 | 13.027909 | 9.646915  | 1.917587  |
| 79 | 11.282020 | 11.286587 | 1.856307  |
| 1  | 10.776058 | 14.057462 | 3.238819  |
| 1  | 9.486414  | 9.715995  | 7.656933  |
| 1  | 8.694803  | 9.530340  | 6.083950  |
| 1  | 10.779418 | 11.689603 | 8.119627  |
| 1  | 10.937060 | 12.949018 | 6.884911  |
| 1  | 12.844100 | 9.284682  | 6.352023  |
| 1  | 11.883807 | 9.570994  | 7.811766  |
| 1  | 9.575235  | 12.837495 | 4.911255  |
| 1  | 8.647962  | 11.382712 | 4.551274  |
| 1  | 13.316227 | 11.109666 | 4.863667  |
| 1  | 12.514179 | 12.667924 | 5.103565  |

|   |           |           |           |
|---|-----------|-----------|-----------|
| 1 | 9.975969  | 8.829983  | 4.184615  |
| 1 | 11.737129 | 8.723317  | 4.292870  |
| 1 | 13.363764 | 11.368762 | -0.349956 |
| 1 | 13.445716 | 11.418014 | -2.828170 |
| 1 | 11.283934 | 11.408088 | -4.090575 |
| 1 | 9.154817  | 11.386073 | -2.813739 |
| 1 | 8.789526  | 10.478238 | 0.468308  |
| 1 | 8.010872  | 11.450413 | -0.766165 |
| 1 | 7.231622  | 15.523654 | 1.360818  |
| 1 | 7.127040  | 13.494973 | -0.036442 |
| 1 | 9.086292  | 15.814218 | 2.978478  |

The atomic coordinates (Å) of Cl<sub>2</sub>Hg(PTA); **18**<sub>opt</sub>(gas).

|    |           |           |           |
|----|-----------|-----------|-----------|
| 15 | -0.419676 | 2.311244  | 0.149198  |
| 6  | 0.433272  | 3.321284  | -1.155325 |
| 6  | -2.162949 | 2.717657  | -0.346127 |
| 6  | -0.265941 | 3.524479  | 1.547469  |
| 7  | -0.084172 | 4.682989  | -1.215375 |
| 7  | -2.363966 | 4.152930  | -0.504811 |
| 7  | -0.700886 | 4.858515  | 1.147128  |
| 6  | 0.107536  | 5.386024  | 0.049905  |
| 6  | -1.505746 | 4.702066  | -1.551858 |
| 6  | -2.104168 | 4.871802  | 0.739254  |
| 1  | 1.505300  | 3.344209  | -0.947822 |
| 1  | 0.295760  | 2.822677  | -2.117123 |
| 1  | -2.380946 | 2.200332  | -1.282835 |
| 1  | -2.850269 | 2.331523  | 0.409730  |
| 1  | -0.865599 | 3.178223  | 2.391614  |
| 1  | 0.773133  | 3.559235  | 1.880916  |
| 1  | -0.168051 | 6.432066  | -0.098523 |
| 1  | 1.162180  | 5.346145  | 0.328512  |
| 1  | -1.799744 | 5.739953  | -1.720949 |
| 1  | -1.664003 | 4.144017  | -2.475928 |
| 1  | -2.403880 | 5.912233  | 0.598333  |
| 1  | -2.714798 | 4.444734  | 1.536894  |
| 80 | 0.109524  | -0.351746 | -0.139771 |
| 17 | -0.607383 | -0.277390 | -2.384448 |
| 17 | 0.942566  | -1.353052 | 1.785763  |

The atomic coordinates (Å) of Cl<sub>2</sub>Hg(PTA); **18**<sub>opt</sub>(water).

|    |           |           |           |
|----|-----------|-----------|-----------|
| 15 | -0.486588 | 2.327557  | -0.053524 |
| 6  | 0.372840  | 3.389760  | -1.298617 |
| 6  | -2.232718 | 2.783716  | -0.453263 |
| 6  | -0.250370 | 3.392707  | 1.437122  |
| 7  | -0.115375 | 4.764492  | -1.224106 |
| 7  | -2.388903 | 4.235546  | -0.486343 |
| 7  | -0.659052 | 4.767515  | 1.164333  |
| 6  | 0.135094  | 5.360514  | 0.088550  |
| 6  | -1.546731 | 4.848167  | -1.513286 |
| 6  | -2.074740 | 4.847082  | 0.805301  |
| 1  | 1.446953  | 3.363520  | -1.109774 |
| 1  | 0.198404  | 2.983141  | -2.295864 |
| 1  | -2.500724 | 2.355597  | -1.420381 |
| 1  | -2.895268 | 2.352482  | 0.298378  |
| 1  | -0.835672 | 2.983285  | 2.261986  |
| 1  | 0.800484  | 3.364716  | 1.729185  |
| 1  | -0.115212 | 6.421023  | 0.030111  |
| 1  | 1.194505  | 5.266438  | 0.330407  |
| 1  | -1.815025 | 5.903726  | -1.582554 |
| 1  | -1.748548 | 4.374848  | -2.474896 |
| 1  | -2.350234 | 5.901757  | 0.754087  |
| 1  | -2.670959 | 4.370338  | 1.584307  |
| 80 | 0.145822  | -0.141892 | 0.141491  |
| 17 | -0.253184 | -0.920665 | -2.274437 |
| 17 | 0.912292  | -1.293221 | 2.185608  |

The atomic coordinates (Å) of  $\text{I}_2\text{Hg}(\text{PTA})$ ;  $\mathbf{20}_{\text{opt}}(\text{gas})$ .

|    |           |           |           |
|----|-----------|-----------|-----------|
| 15 | -0.437534 | 2.322543  | 0.100224  |
| 6  | 0.419591  | 3.349131  | -1.186345 |
| 6  | -2.180865 | 2.744506  | -0.375746 |
| 6  | -0.266078 | 3.497373  | 1.526568  |
| 7  | -0.090507 | 4.714408  | -1.212267 |
| 7  | -2.370295 | 4.184340  | -0.501605 |
| 7  | -0.694021 | 4.842250  | 1.156807  |
| 6  | 0.112808  | 5.388241  | 0.067443  |
| 6  | -1.513624 | 4.750181  | -1.541135 |
| 6  | -2.099356 | 4.873900  | 0.757020  |
| 1  | 1.492221  | 3.359068  | -0.981777 |
| 1  | 0.275903  | 2.873512  | -2.158970 |
| 1  | -2.409500 | 2.249137  | -1.321894 |
| 1  | -2.864936 | 2.345974  | 0.376385  |
| 1  | -0.863651 | 3.134640  | 2.365130  |
| 1  | 0.775124  | 3.515650  | 1.854318  |
| 1  | -0.155993 | 6.439069  | -0.056763 |
| 1  | 1.168485  | 5.334710  | 0.339383  |
| 1  | -1.801388 | 5.793299  | -1.686248 |
| 1  | -1.680346 | 4.213455  | -2.476307 |
| 1  | -2.392903 | 5.918976  | 0.640524  |
| 1  | -2.708788 | 4.433219  | 1.548009  |
| 80 | 0.112195  | -0.287508 | -0.083130 |
| 53 | -0.618647 | -0.582632 | -2.646606 |
| 53 | 1.059202  | -1.405293 | 2.120804  |

The atomic coordinates (Å) of I<sub>2</sub>Hg(PTA); **20**<sub>opt</sub>(water).

|    |           |           |           |
|----|-----------|-----------|-----------|
| 15 | 1.709379  | -0.457760 | -0.034754 |
| 6  | 2.654130  | 0.989232  | -0.683866 |
| 6  | 2.543137  | -0.632643 | 1.604427  |
| 6  | 2.578744  | -1.807369 | -0.951264 |
| 7  | 4.090854  | 0.764313  | -0.556367 |
| 7  | 3.992299  | -0.654687 | 1.436573  |
| 7  | 4.023498  | -1.672074 | -0.789637 |
| 6  | 4.521203  | -0.404287 | -1.324115 |
| 6  | 4.488470  | 0.585151  | 0.840248  |
| 6  | 4.425995  | -1.782314 | 0.611924  |
| 1  | 2.385872  | 1.149653  | -1.729900 |
| 1  | 2.357928  | 1.879230  | -0.125622 |
| 1  | 2.248961  | 0.201439  | 2.243201  |
| 1  | 2.207524  | -1.554255 | 2.079905  |
| 1  | 2.247758  | -2.774664 | -0.570521 |
| 1  | 2.312071  | -1.750965 | -2.007556 |
| 1  | 5.612128  | -0.435803 | -1.306551 |
| 1  | 4.193773  | -0.295149 | -2.358440 |
| 1  | 5.578469  | 0.563901  | 0.882489  |
| 1  | 4.134584  | 1.432599  | 1.427926  |
| 1  | 5.515399  | -1.824472 | 0.645706  |
| 1  | 4.028846  | -2.708893 | 1.029490  |
| 80 | -0.778885 | -0.157556 | -0.045410 |
| 53 | -1.035380 | 2.771331  | 0.018925  |
| 53 | -3.081031 | -1.736638 | 0.032506  |

The atomic coordinates (Å) of Hg<sup>2+</sup>(PTA).

|    |           |          |           |
|----|-----------|----------|-----------|
| 15 | -0.493085 | 2.358316 | -0.050185 |
| 6  | 0.385993  | 3.383063 | -1.303675 |
| 6  | -2.243052 | 2.772685 | -0.450690 |
| 6  | -0.243783 | 3.388449 | 1.456889  |
| 7  | -0.112432 | 4.750611 | -1.222652 |
| 7  | -2.384247 | 4.223197 | -0.485050 |
| 7  | -0.656186 | 4.755335 | 1.162404  |
| 6  | 0.139897  | 5.350582 | 0.088103  |
| 6  | -1.543730 | 4.832692 | -1.516463 |
| 6  | -2.073627 | 4.836281 | 0.807050  |
| 1  | 1.457709  | 3.353272 | -1.106670 |
| 1  | 0.209540  | 2.968379 | -2.296291 |
| 1  | -2.505041 | 2.338811 | -1.415824 |
| 1  | -2.897737 | 2.341498 | 0.306670  |
| 1  | -0.834587 | 2.977791 | 2.275919  |
| 1  | 0.807099  | 3.358093 | 1.745221  |
| 1  | -0.114311 | 6.409287 | 0.027844  |
| 1  | 1.199257  | 5.260845 | 0.329455  |
| 1  | -1.812038 | 5.887125 | -1.589527 |
| 1  | -1.744523 | 4.355870 | -2.475990 |
| 1  | -2.348029 | 5.890322 | 0.754354  |
| 1  | -2.669792 | 4.360657 | 1.586073  |
| 80 | 0.084688  | 0.062876 | 0.085683  |
